# Supplementary material for: Combination of aluminum molecular rings with chemical reduction centers for iodine capture and aggregation
Source: Royal Society of Chemistry journal article supplement (doi:10.1039/d2qi01108e), 2022-01-01
Supplement: d2qi01108e1.pdf [file d2qi01108e1.pdf]

< **Electronic Supporting Information** >

**Combination of Aluminum Molecular Rings with Chemical  
Reduction Centers for Iodine Capture and Aggregation**

Dan Luo, Fei Wang, Chen-Hui Liu, San-Tai Wang, Ya-Yong Sun, Wei-Hui Fang\* and Jian Zhang

State Key Laboratory of Structural Chemistry, Fujian Institute of Research on the Structure of  
Matter, Chinese Academy of Sciences, Fuzhou, Fujian 350002, China

Email: fwh@fjirsm.ac.cn

**Content**

|                                                               |            |
|---------------------------------------------------------------|------------|
| <b>1. Synthesis.....</b>                                      | <b>S2</b>  |
| <b>2.The structure information for porous materials .....</b> | <b>S4</b>  |
| <b>3. PXRD spectra of porous materials.....</b>               | <b>S9</b>  |
| <b>4. Massive production.....</b>                             | <b>S11</b> |
| <b>5. Stability of porous materials.....</b>                  | <b>S12</b> |
| <b>6. TGA test for porous materials.....</b>                  | <b>S14</b> |
| <b>7. EDS spectra of porous materials.....</b>                | <b>S15</b> |
| <b>8. FT-IR spectra of porous materials.....</b>              | <b>S17</b> |
| <b>9. Determination of the valence state of metals.....</b>   | <b>S19</b> |
| <b>10. Single-component gas sorption measurement.....</b>     | <b>S22</b> |
| <b>11. Isotheric heat of gas adsorption .....</b>             | <b>S24</b> |
| <b>12. IAST calculations of adsorption selectivity .....</b>  | <b>S24</b> |
| <b>13. Iodine capture, release and recyclability .....</b>    | <b>S25</b> |
| <b>14.Crystallography data.....</b>                           | <b>S34</b> |
| <b>15. Reference .....</b>                                    | <b>S39</b> |

# 1. Synthesis

## Synthesis of AIOC-150

A mixture of aluminum isopropoxide (204 mg, 1 mmol), 3-Aminoisonicotinic acid (210 mg, 1.52 mmol); Iron (III) chloride anhydrous (60 mg, 0.37 mmol), methylamine ethanol solution (40 %, 120  $\mu$ L), n-butanol (2.5 mL) and DMF (2.5 mL) was sealed in a 20 mL vial and transferred to a preheated oven at 120 °C for 4 days. When cooled to room temperature, orange crystals were obtained. (yield: 65 % based on Al(O<sup>i</sup>Pr)<sub>3</sub>). The crystals are rinsed with DMF and preserved under a sealed and dry environment. FT-IR (KBr, cm<sup>-1</sup>): 3453(s), 3074(w), 2958(w), 2850(w), 2706(m), 1661(s), 1597(m), 1490(s), 1252(m), 1047(m), 995(m), 910(s), 754(s) 702(m), 682(m), 630(m), 511(s). Elemental analysis calcd. (%) for Al<sub>8</sub>Fe<sub>2</sub>Cl<sub>4</sub>C<sub>104</sub>N<sub>24</sub>O<sub>43</sub>H<sub>142</sub> (MW 2885.75): C 43.25, N 11.65, H 4.96; found C 45.46, N 13.58, H 5.75.

## Synthesis of AIOC-151 - AIOC-154

A mixture of aluminum isopropoxide (204 mg, 1 mmol), isonicotinic acid (120 mg, 1 mmol), Iron (III) chloride anhydrous or Chromium (II) chloride hexahydrate or Nickel (II) chloride hexahydrate or Iron (III) bromide anhydrous (60 mg, 0.37 mmol; 30 mg, 0.13 mmol; 30 mg, 0.25mmol; 90 mg, 0.3 mmol), methylamine ethanol solution (40 %, 120  $\mu$ L), n-butanol (2.5 mL) and DMF (2.5 mL) was sealed in a 20 mL vial and transferred to a preheated oven at 100 °C for 4 days. When cooled to room temperature, deep red **AIOC-151**, light pink **AIOC-152**, light green **AIOC-153** and red crystals **AIOC-154** were obtained. The crystals are rinsed with DMF and preserved under a sealed and dry environment. (yield: 53 %; 25 %; 28 %; 36% based on Al(O<sup>i</sup>Pr)<sub>3</sub>). **AIOC-151**-FT-IR (KBr, cm<sup>-1</sup>): 2954(w), 2917(w), 2868(w), 2842(w), 1674(m), 1607(s), 1552(s), 1491(s), 1443(s), 1215(w), 1127(w), 1063(m), 997(w) 782(m), 694(m), 562(m). **AIOC-152**-FT-IR (KBr, cm<sup>-1</sup>): 3389(w), 3217(w), 2961(w), 2868(w), 1610(s), 1545(s), 1500(m), 1444(s), 1374(s), 1225(w), 1056(m), 1013(w), 858(w) 777(m), 701(m), 557(m). **AIOC-153**-FT-IR (KBr, cm<sup>-1</sup>): 3444(s), 2969(w), 1614(s), 1545(s), 1437(w), 1397(w), 1342(w), 1232(w), 1163(w), 1067(w), 873(w), 768(m), 722(w) 693(w). **AIOC-154**-FT-IR (KBr, cm<sup>-1</sup>): 3401(s), 2961(m), 2874(w), 1608(s),1542(s), 1501(m), 1449(s), 1223(w), 1064(m), 780(m), 696(m), 563(m). Elemental analysis calcd. (%) for Al<sub>8</sub>Fe<sub>3</sub>Cl<sub>6</sub>C<sub>104</sub>N<sub>12</sub>O<sub>38</sub>H<sub>132</sub> (MW 2754.30): C 45.35, N 6.10, H 4.83; found C 42.24, N 7.91, H 4.67. Elemental analysis calcd. (%) for Al<sub>8</sub>Co<sub>3</sub>Cl<sub>7</sub>C<sub>108</sub>N<sub>8</sub>O<sub>38</sub>H<sub>132</sub> (MW 2791.06): C 46.48, N 4.01, H 4.77; found C 46.14, N 6.64, H 5.75. Elemental analysis calcd. (%) for Al<sub>8</sub>Ni<sub>3</sub>Cl<sub>8</sub>C<sub>104</sub>N<sub>12</sub>O<sub>36</sub>H<sub>124</sub> (MW 2617.34): C 47.73, N 6.42, H 4.78; found C 45.76, N 7.65, H 4.75.

Elemental analysis calcd. (%) for  $\text{Al}_8\text{Fe}_3\text{Br}_7\text{C}_{104}\text{N}_{12}\text{O}_{36}\text{H}_{124}$  (MW 3057.71): C 40.85, N 5.50, H 4.09; found C 41.73, N 6.63, H 3.33.

#### Synthesis of AIOC-155

A mixture of aluminum isopropoxide (204 mg, 1 mmol), 3-Chloroisonicotinic acid (240 mg, 1.52 mmol), Iron (III) chloride anhydrous (60 mg, 0.37 mmol), methylamine ethanol solution (40 %, 120  $\mu\text{L}$ ), n-butanol (2.5 mL) and DMF (2.5 mL) was sealed in a 20 mL vial and transferred to a preheated oven at 100 °C for 4 days. When cooled to room temperature, red crystals were obtained. (yield: 52 % based on  $\text{Al}(\text{O}^i\text{Pr})_3$ ). The crystals are rinsed with DMF and preserved under a sealed and dry environment. **AIOC-155**-FT-IR (KBr,  $\text{cm}^{-1}$ ): 3433(s), 2955(w), 2880(w), 1666(m), 1628(s), 1481(m), 1597(m), 1443(s), 1330(w), 1275(w), 1157(w), 1099(m), 1055(w) 846(w), 789(m), 673(m), 560(s). Elemental analysis calcd. (%) for  $\text{Al}_8\text{Fe}_3\text{Cl}_{19}\text{C}_{104}\text{N}_{12}\text{O}_{36}\text{H}_{112}$  (MW3162.99): C 39.49, N 5.31, H 3.57; found C 38.60, N 6.85, H 4.01.

#### X-ray Crystallographic Analyses

Crystallographic data of crystal **AIOC-151**, **AIOC-152**, **AIOC-154** and **AIOC-151'** were collected on Hybrid Pixel Array detector equipped with Ga-K $\alpha$  radiation ( $\lambda=1.3405 \text{ \AA}$ ) at about 293K, as well as **AIOC-150**, **AIOC-153**, **AIOC-155**, **I<sub>2</sub>@ AIOC-151**, **I<sub>2</sub>@ AIOC-155**, and **AIOC-155'** was at 100K. The structures were solved with the dual-direct methods using ShelxT and refined with the full-matrix least-squares technique based on  $F^2$  using the SHELXL.<sup>[2]</sup> Non-hydrogen atoms were refined anisotropically. Hydrogen atoms were added theoretically, riding on the concerned atoms and refined with fixed thermal factors. And n-butyl alcohol molecules are severely disordered and the related hydrogen atoms were not included. All absorption corrections were performed using the multi-scan program. In the crystal data after iodine adsorption, the large peaks of electron density within the pores were identified as iodine. Unfortunately, due to the disorder and poor crystal quality caused by high-temperature iodine steam treatment of the sample,  $wR_2$  value is high, but there is no problem with the crystal data before treatment, so we are confident that the data after iodine adsorption is valid. The obtained crystallographic data are summarized in Table S8-S11.

#### Reference:

1. W.-W. Wendlandt, H.-G.Hecht, *Reflectance Spectroscopy*; Interscience: New York, 1966.
2. G.-M. Sheldrick, *Acta Crystallogr A Found Adv* 2015, **71** (Pt 1), 3-8.

## 2.The structure information for porous materials

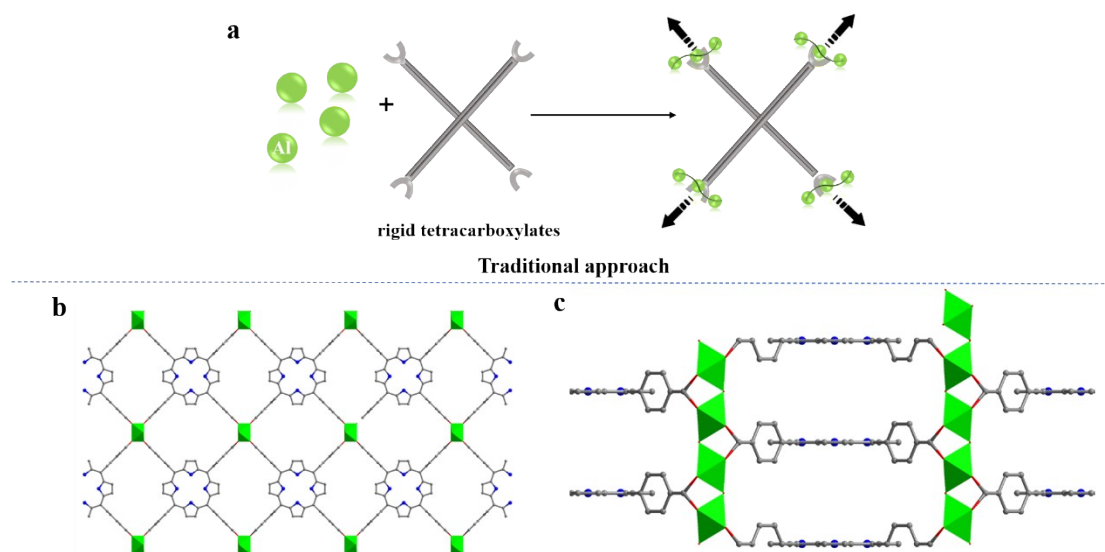

Fig. S1. (a) Traditional approach employing aluminum ions and rigid tetracarboxylic acid ligand.<sup>[1]</sup> (b) Perspective view of Al-PMOF linked by meso-tetra(4-carboxyl-phenyl) porphyrin ligand along the [010] direction. (c) Perspective view of Al-PMOF along the [001] direction.

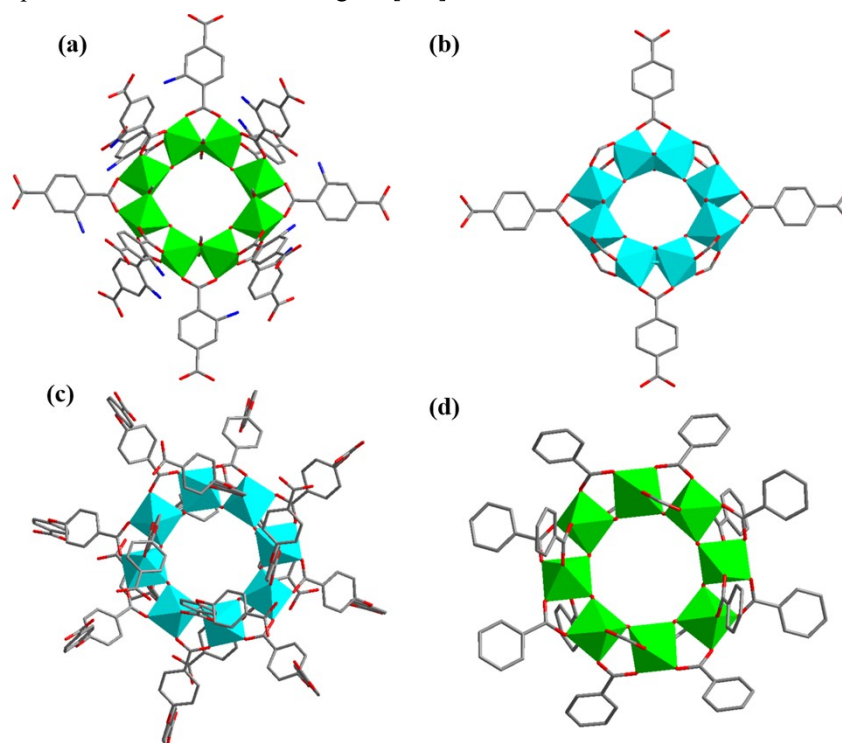

Fig. S2. The edge- and corner-sharing arrangement of the eight octahedral: (a) in CAU-1, (b) in MIL-125. The corner-sharing arrangement of the eight octahedral (c) in FIR-125, (d) in MOF-520. H<sub>3</sub>BTB is reduced to benzene for clarity. Color codes: Al, green; Ti, cyan; C, gray; N, blue; O, red.

Table S1. The representative 3D frameworks containing aluminum.

| Compounds               | Nodes/linker                                                                                                                                    | Topology/Schläfli symbol                                                                        | reference |
|-------------------------|-------------------------------------------------------------------------------------------------------------------------------------------------|-------------------------------------------------------------------------------------------------|-----------|
| CAU-1                   | $\{\text{Al}_8(\text{OH})_4(\text{OCH}_3)_8\}^{12+}$<br>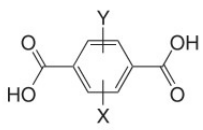       |  <i>fcu</i>   | [2]       |
| CAU-3                   | $[\text{Al}_{12}(\text{OCH}_3)_{24}]^{12+}$<br>                |  <i>fcu</i>   | [3]       |
| CAU-21-BPDC             | $\text{Al}_8(\text{OH})_8(\text{COO})_{16}$<br>                |  <i>bcc</i>   | [4]       |
| MIL-53                  | infinite chains of $\text{AlO}_4(\text{OH})_2$<br>           |  -/-         | [5]       |
| MIL-68                  | infinite chains of $\text{AlO}_4(\text{OH})_2$<br>           |  -/-        | [6]       |
| MIL-101-NH <sub>2</sub> | $[\text{Al}_3\text{O}(\text{H}_2\text{O})_2(\text{OH})]$<br> |  <i>MTN</i> | [7]       |
| Al-PMOF                 | infinite chains of $\text{AlO}_4(\text{OH})_2$<br>           |  -/-        | [1]       |
| MOF-303                 | $\{\text{AlO}_6\}$<br>                                       |  <i>xxh</i> | [8]       |
| MOF-519                 | $\text{Al}_8(\text{OH})_8(\text{BTB})_4(\text{H}_2\text{BTB})_4$<br><p style="text-align: right;">S5</p>                                        |  <i>sum</i>  | [9]       |

|         |                                   |                |      |
|---------|-----------------------------------|----------------|------|
|         |                                   |                |      |
| MOF-520 | $Al_8(OH)_8(BTB)_4(HCOO)_4$<br>   | <br><i>sum</i> | [10] |
| MOF-523 | $\{AlO_6\}$<br>                   | <br>-/-        | [11] |
| AlOC-81 | $Al_{10}(INA)_{10}(OEt)_{20}$<br> | <br><i>flu</i> | [12] |

Table S2. The representative 3D frameworks that form by eight-membered ring.

| Compound    | The arrangement of eight-membered ring | linker | Topology   | reference |
|-------------|----------------------------------------|--------|------------|-----------|
| Cau-1       |                                        |        | <i>fcu</i> | [2]       |
| MOF-519     |                                        |        | <i>sum</i> | [9]       |
| MOF-520     |                                        |        |            | [10]      |
| CAU-21-BPDC |                                        |        | <i>bcu</i> | [4]       |
| MIL-125     |                                        |        | -          | [13]      |

|          |                                                                                   |                                                                                    |            |           |
|----------|-----------------------------------------------------------------------------------|------------------------------------------------------------------------------------|------------|-----------|
| FIJ-125  |  |  | <i>bcu</i> | [14]      |
| MIP-207  |  |  | -          | [15]      |
| AIOC-150 |  |  | <i>scu</i> | This work |
| AIOC-151 |  |  | <i>ftw</i> | This work |

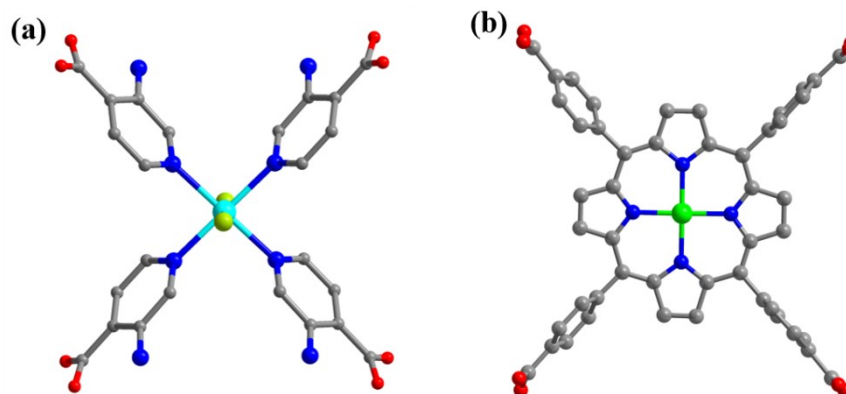

Fig. S3. (a) flexible pseudo-tetracarboxylic acid ligand in **AIOC-150**; (b) rigid metalloporphyrin carboxylic ligands. Color codes: Ti, green; Fe, cyan; C, gray; N, blue; O, red.; Cl, lime.

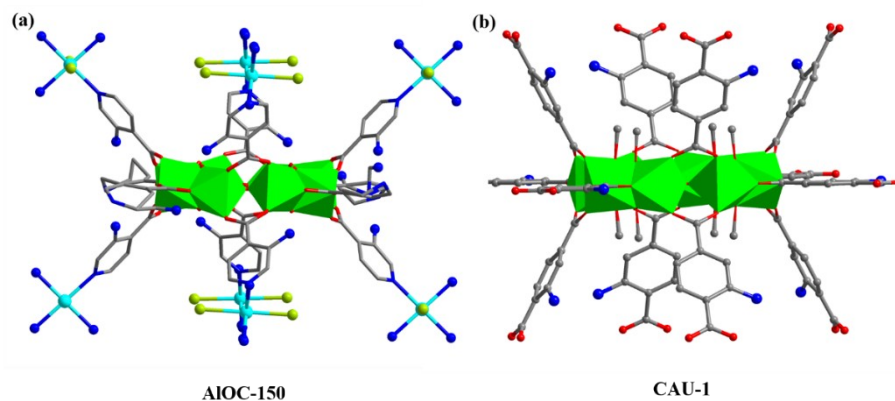

Fig. S4. (a) The 8-connected Al<sub>8</sub> ring in AIOC-150; (b) the 12-connected Al<sub>8</sub> ring in CAU-1.

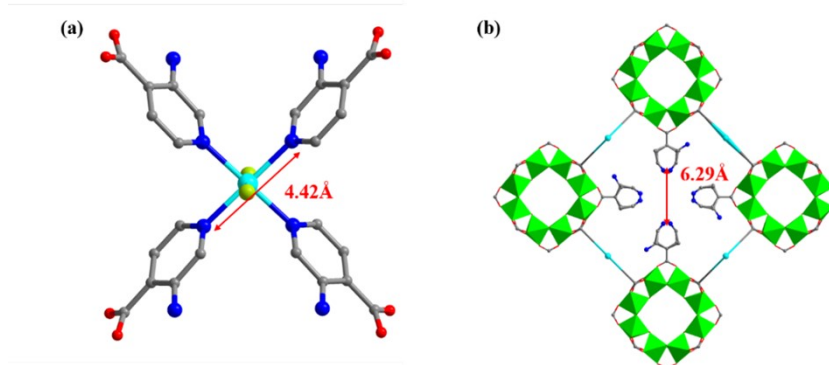

Fig. S5. the distance of N...N (a) in PT-cis linkers; (b) in breaking PT linkers.

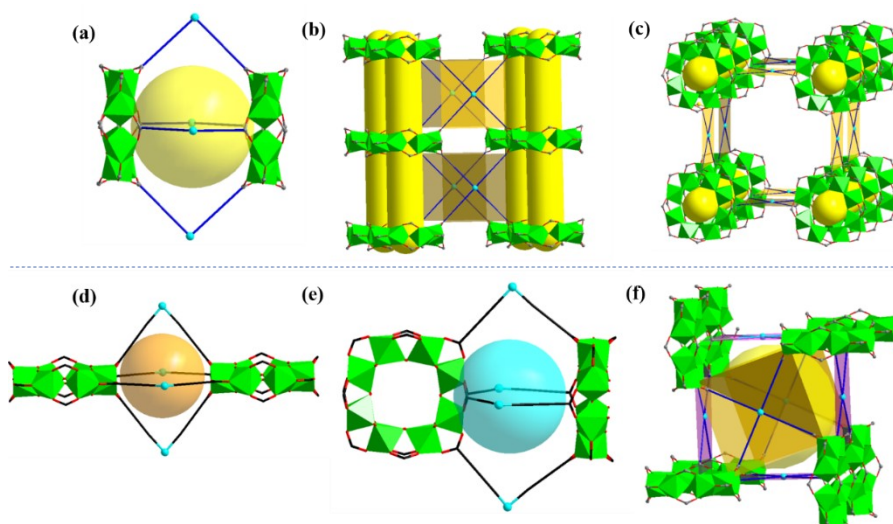

Fig. S6. (a) octahedral cage; (b) nanotubes (side view); (c) nanotubes (top view) in AIOC-150; (d) octahedral cage; (e) novel basket-type cage; (f) tetragonal cage in AIOC-151. The cage I consist of an octahedral cage containing two neck-and-neck Al<sub>8</sub> rings ( $13.83 \text{ \AA} \times 17.56 \text{ \AA} \times 8.15 \text{ \AA}$ ) (orange ball), cage II is a basket-type cage made up of two vertical Al<sub>8</sub> rings ( $15.69 \text{ \AA} \times 18.57 \text{ \AA} \times 10.63 \text{ \AA}$ ) (blue ball), while cage III is a tetragonal cage surrounded by eight Al<sub>8</sub> rings ( $15.78 \text{ \AA} \times 15.78 \text{ \AA} \times 18.31 \text{ \AA}$ ) (yellow ball). Color codes: Al, green; C, gray; N, blue; O, red.



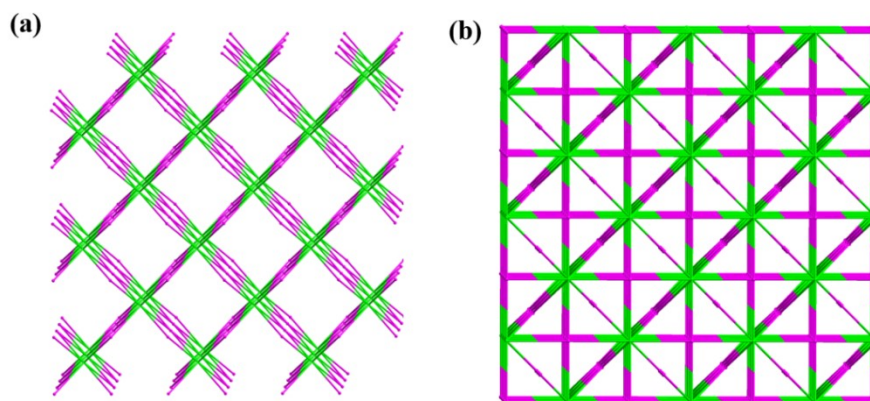

Fig. S7. (a) *scu* topology for AIOC-150; (b) *ftw* topology for AIOC-151. Color codes: Al, green; C, gray; N, blue; O, red.

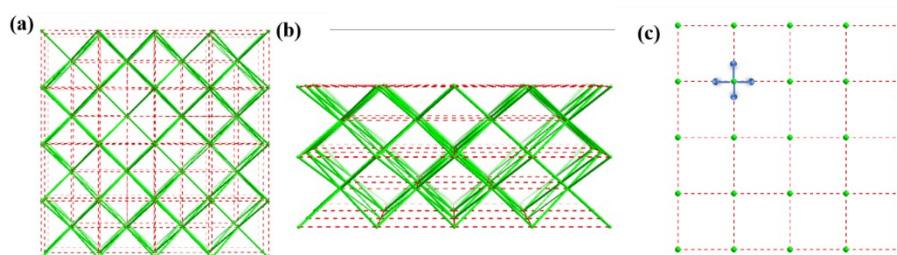

Fig. S8. (a) top view; (b) side view of *scu* topology transform to *ftw* topology; (c) the position of N on the IN ligands. The red dotted line represents the connection of the decorated IN ligands. Color codes: Al, green; C, gray; N, blue; O, red.

### 3. PXRD spectra of porous materials

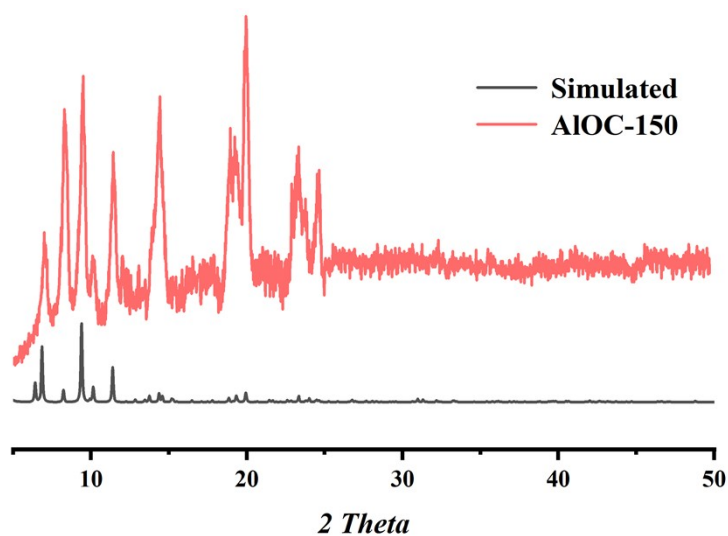

Fig. S9. Simulated single-crystal PXRD patterns (black) and experimental PXRD patterns (red) of AIOC-150. The first two narrow peaks fused into one broad peak even though the crystals were selected one by one by hand.

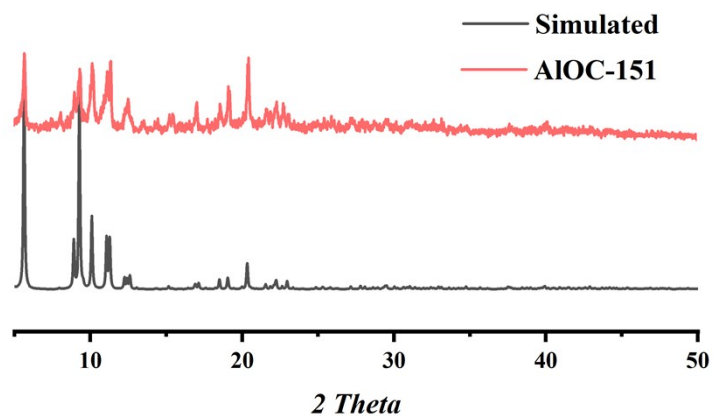

Fig. S10. Simulated PXRD patterns (black) and experimental PXRD patterns (red) of **AIOC-151**.

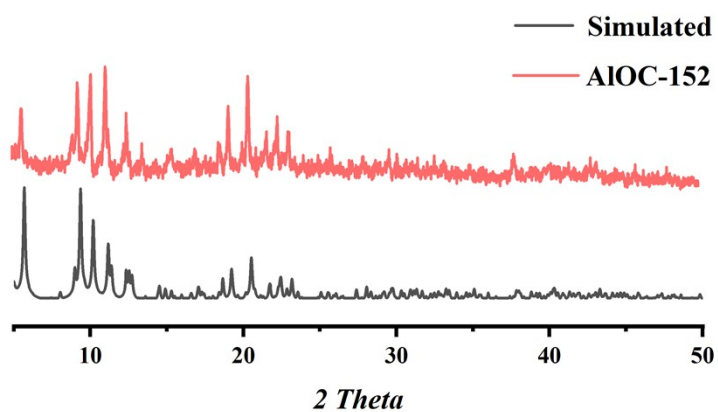

Fig. S11. Simulated PXRD patterns (black) and experimental PXRD patterns (red) of **AIOC-152**.

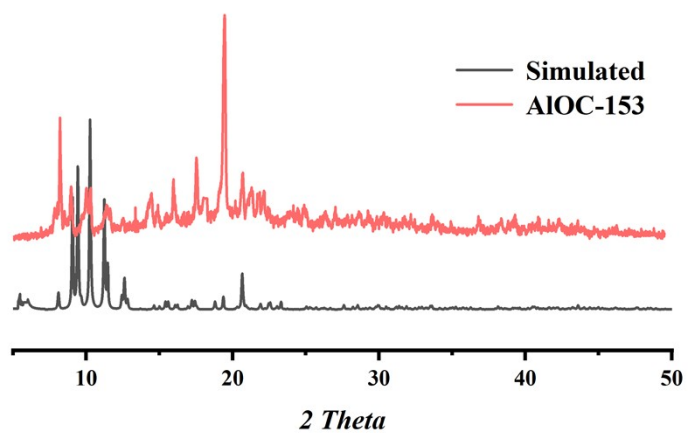

Fig. S12. Simulated PXRD patterns (black) and experimental PXRD patterns (red) of **AIOC-153**.

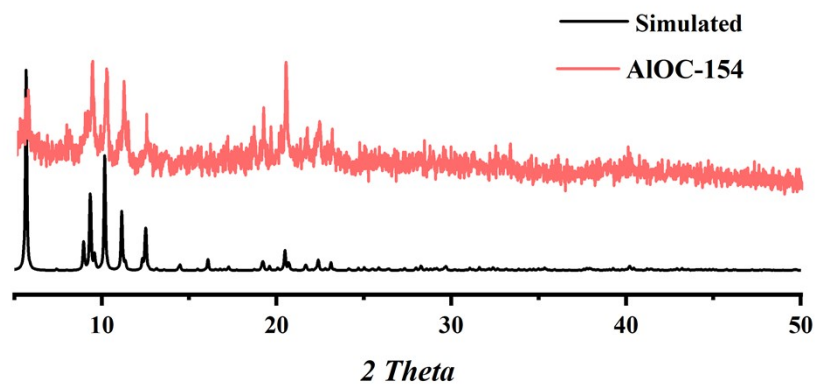

Fig. S13. Simulated PXRD patterns (black) and experimental PXRD patterns (red) of AIOC-154.

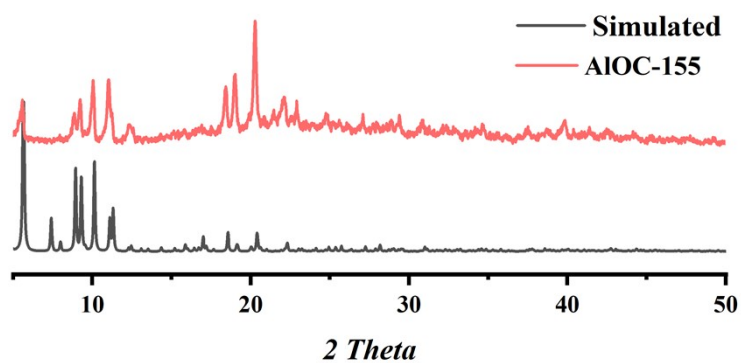

Fig. S14. Simulated PXRD patterns (black) and experimental PXRD patterns (red) of AIOC-155.

#### 4. Massive production.

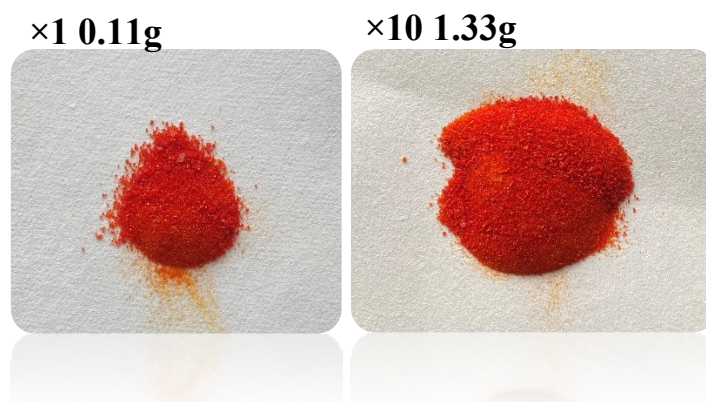

Fig. S15. Massive production of AIOC-151.

## 5. Stability of porous materials

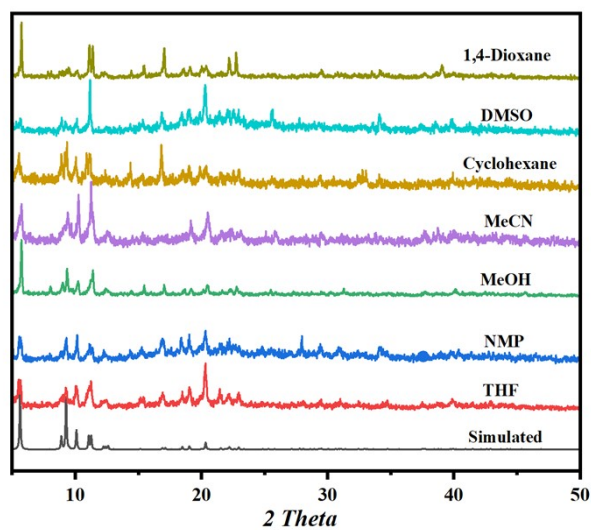

Fig. S16. PXRD patterns of AIOC-151 in different organic solvents at room temperature for 24 h.

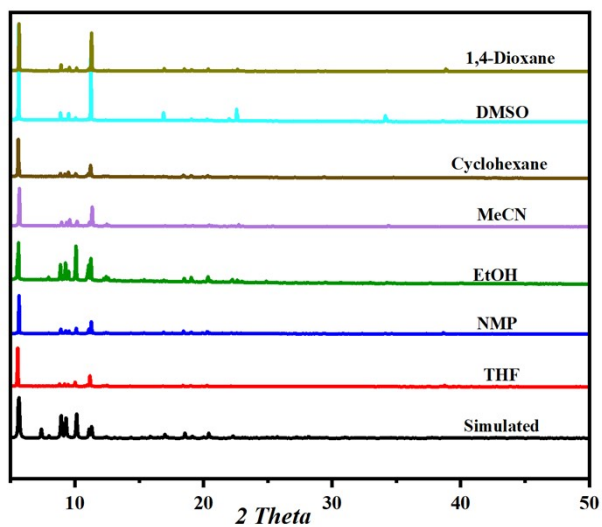

Fig. S17. PXRD patterns of AIOC-155 in different organic solvents at room temperature for 24 h.

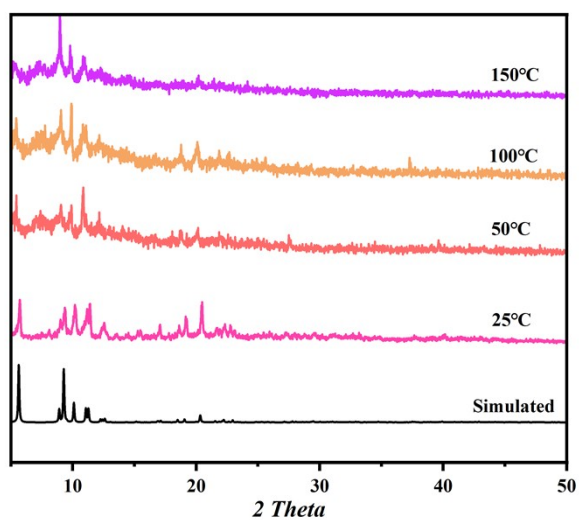

Fig. S18. The Temperature-dependent PXRD patterns of AIOC-151.

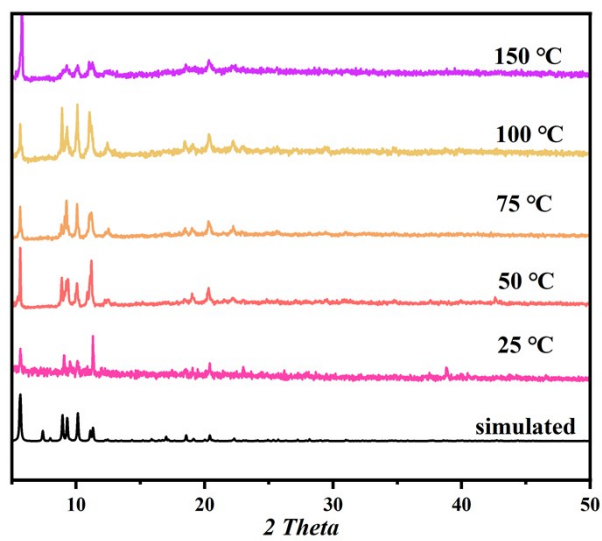

Fig. S19. The Temperature-dependent PXRD patterns of AIOC-155.

## 6. TGA test for porous materials

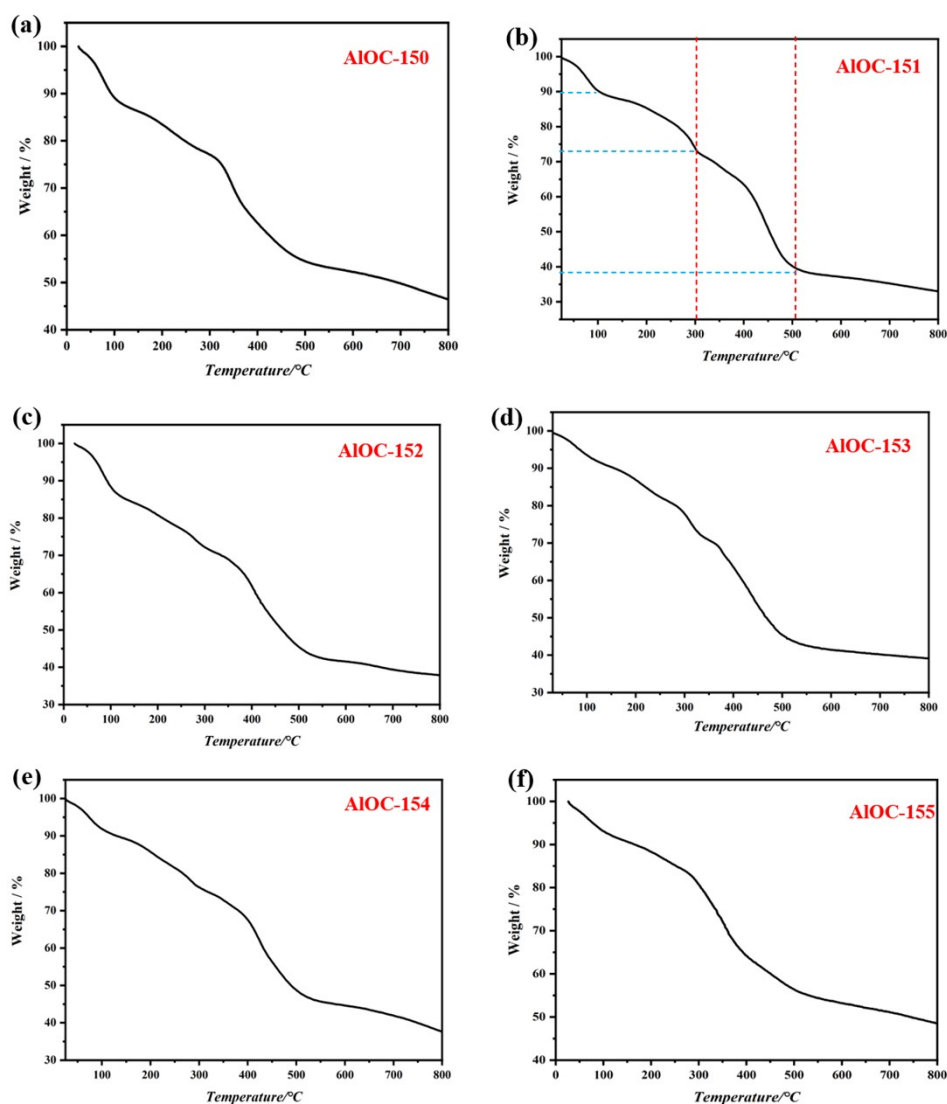

Fig. S20. The TGA curve of AIOC-150 to AIOC-155.

The thermal stability of AIOC-150 to AIOC-155 was investigated in  $N_2$  atmosphere up to 800 °C with a heating rate of  $10 \text{ K min}^{-1}$ , which is presented in Fig. S20. There are similar structures and compositions in AIOC-150 to AIOC-155, so only the TG investigation of AIOC-151 was described in detail. It reveals a weight loss (10%) between 25 and 100 °C and is assigned to the removal of incorporated water from the pores of the framework. Then weight loss (17.3%) around 306 °C can be attributed to the removal of DMF. The third weight loss (32.5%) between 306 and 501 is assigned to the departure of the organic ligand owing to degradation of the structure.

## 7. EDS spectra of porous materials

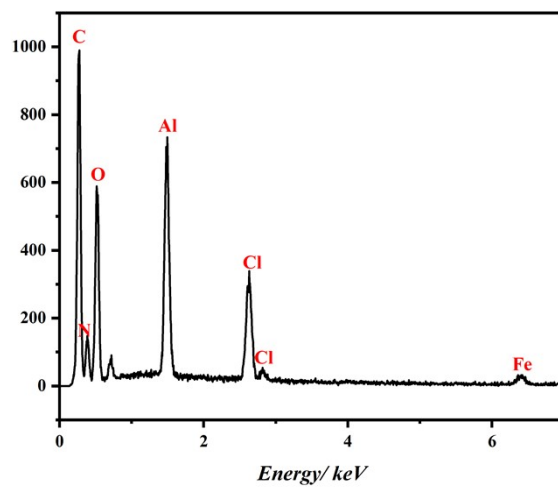

Fig. S21. The EDS spectrum of compound AIOC-150.

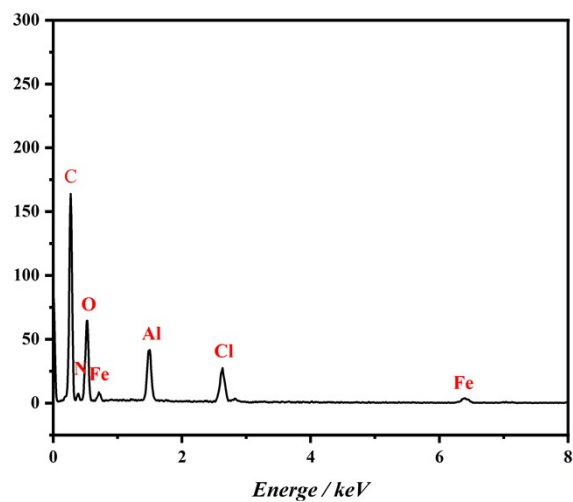

Fig. S22. The EDS spectrum of compound AIOC-151.

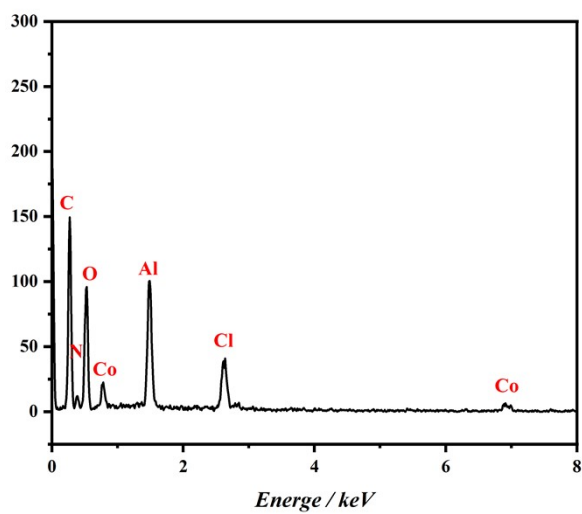

Fig. S23. The EDS spectrum of compound AIOC-152.

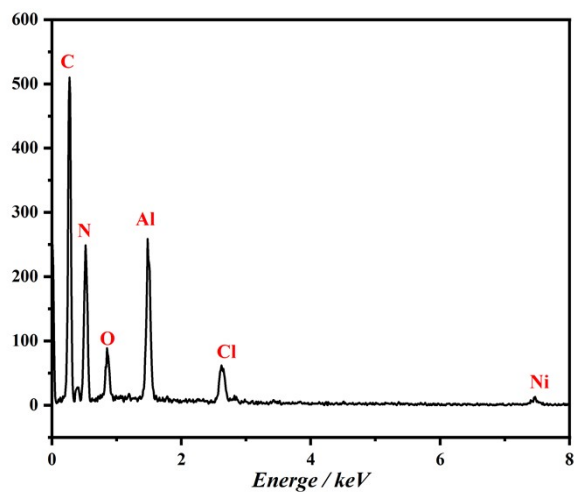

Fig. S24. The EDS spectrum of compound AIOC-153.

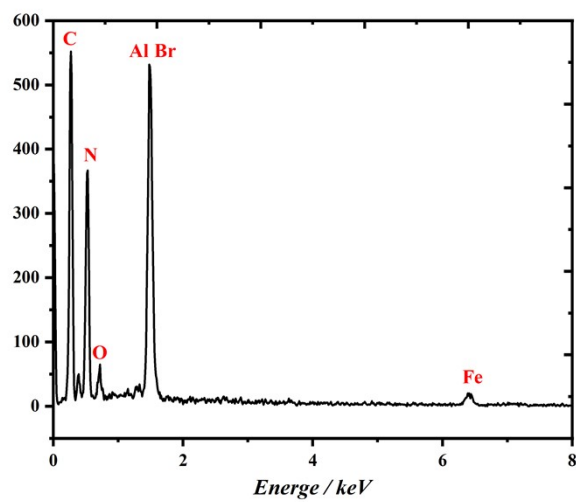

Fig. S25. The EDS spectrum of compound AIOC-154.

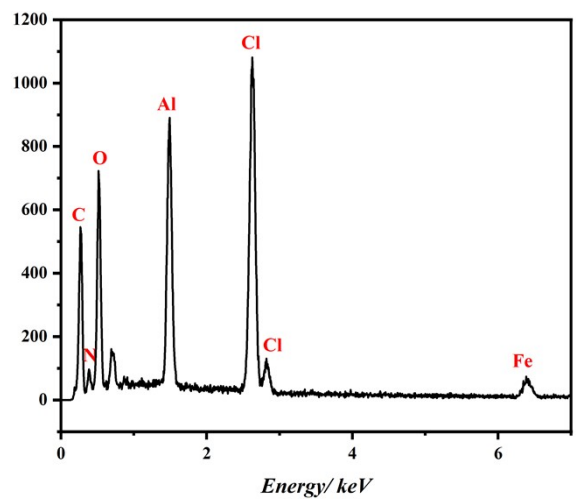

Fig. S26. The EDS spectrum of compound AIOC-155.



## 8. FT-IR spectra of porous materials

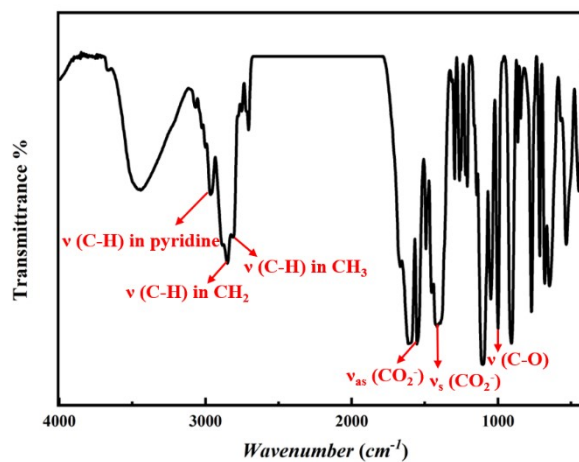

Fig. S27. IR spectrum of AIOC-150.

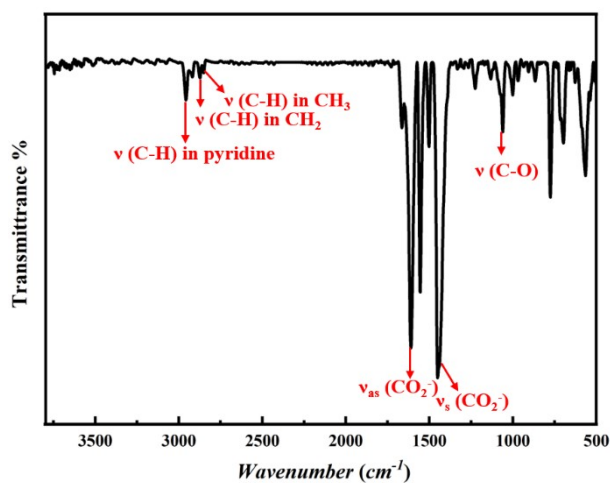

Fig. S28. IR spectrum of AIOC-151.

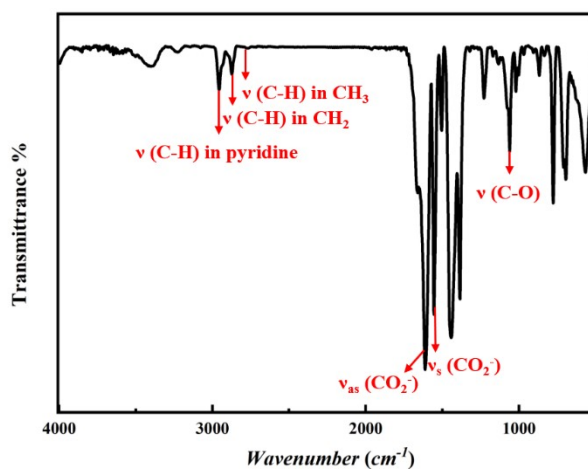

Fig. S29. IR spectrum of AIOC-152.

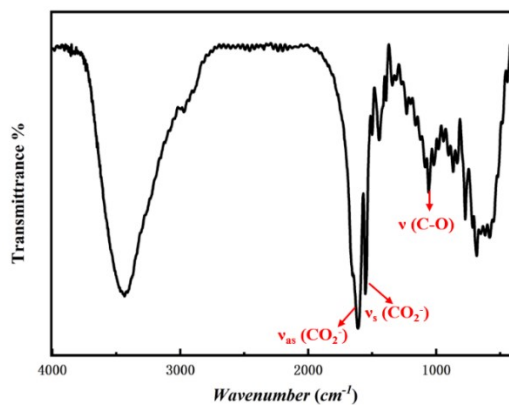

Fig. S30. IR spectrum of AIOC-153.

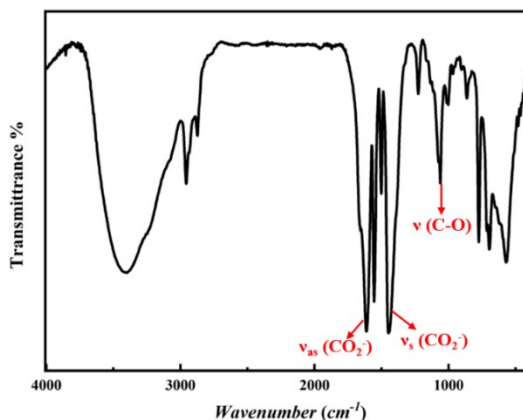

Fig. S31. IR spectrum of AIOC-154.

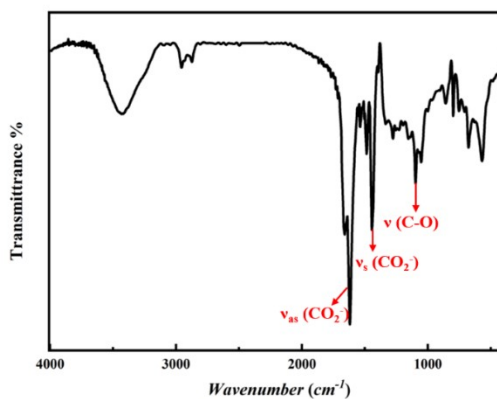

Fig. S32. IR spectrum of AIOC-155.

The IR spectra of AIOC-150 to AIOC-155 have been recorded in the range of 4000–400  $\text{cm}^{-1}$  from solid samples palletized with KBr, which are presented in Fig. S27-S32. In the functional group region ( $\nu > 1300 \text{ cm}^{-1}$ ), the weak absorption bands at 3087–3063  $\text{cm}^{-1}$  are observed, which can be ascribed to the stretching vibration modes of C–H bonds in pyridine rings. On the other hand, the aliphatic C–H stretching-vibrations of the n-butanol oxygen group occur about 3000–2800  $\text{cm}^{-1}$ . Moreover, the asymmetric stretching vibration ( $\nu_{\text{as}}$ ) and symmetric stretching vibration ( $\nu_{\text{s}}$ ) of the carboxylate group can be clearly attributed, namely, the band at 1610–1560  $\text{cm}^{-1}$  is assigned to the  $\nu_{\text{as}}(\text{CO}_2^-)$  whilst the signal at 1440–1360  $\text{cm}^{-1}$  is ascribed to the  $\nu_{\text{s}}(\text{CO}_2^-)$ . In the fingerprint region ( $1300 \text{ cm}^{-1} > \nu > 400 \text{ cm}^{-1}$ ). The incorporation of 3-Chloroisonicotinic acid in AIOC-155 is supported by the C–Cl vibrations at 670  $\text{cm}^{-1}$ . The typical bands for the  $\text{NH}_2$  group at 3497 and 3385  $\text{cm}^{-1}$  are not observed in the AIOC-150 owing to the presence of N–H $\cdots$ O hydrogen bonding.

## 9. Determination of the valence state of metals

Table S3 ICP analysis for porous materials.

|      |      | AIOC-151 | AIOC-152 | AIOC-153 |
|------|------|----------|----------|----------|
| Wt%  | Exp. | Al:6.11% | Al:6.85% | Al:6.09% |
|      |      | Fe:4.13% | Co:4.77% | Ni:4.57% |
|      | Cal. | Al:7.98% | Al:7.74% | Al:8.40% |
|      |      | Fe:6.19% | Co:6.34% | Ni:6.85% |
| Al:M | Exp. | 3.0628:1 | 3.1366:1 | 2.8989:1 |
|      | Cal. | 2.6657:1 | 2.6665:1 | 2.6676:1 |

(M=Fe for AIOC-151; Co for AIOC-152; Ni for AIOC-153)

Table S4 BVS analysis for porous materials.

BVS analysis for AIOC-151

| BVS Value      | Bond distance        |        | BVS Value      | Bond distance        |        |
|----------------|----------------------|--------|----------------|----------------------|--------|
| Al01<br>3.1602 | Al01-O1              | 1.906  | Al02<br>3.1197 | Al02-O3              | 1.952  |
|                | Al01-O1 <sup>1</sup> | 1.906  |                | Al02-O4 <sup>1</sup> | 1.873  |
|                | Al01-O2              | 1.942  |                | Al02-O4              | 1.873  |
|                | Al01-O4 <sup>1</sup> | 1.87   |                | Al02-O6              | 1.8507 |
|                | Al01-O4              | 1.87   |                | Al02-O7              | 1.909  |
|                | Al01-O5              | 1.8436 |                | Al02-O7 <sup>1</sup> | 1.909  |
| Fe01<br>1.9819 | Fe01-N1              | 2.233  | Fe02<br>1.8938 | Fe02-N3 <sup>7</sup> | 2.256  |
|                | Fe01-N1 <sup>6</sup> | 2.233  |                | Fe02-N3              | 2.256  |
|                | Fe01-N2              | 2.235  |                | Fe02-N3 <sup>8</sup> | 2.256  |
|                | Fe01-N2 <sup>6</sup> | 2.235  |                | Fe02-N3 <sup>9</sup> | 2.256  |
|                | Fe01-Cl06            | 2.436  |                | Fe02-Cl05            | 2.444  |
|                | Fe01-Cl06            | 2.436  |                | Fe02-Cl05            | 2.444  |

System code: <sup>1</sup>3/2-Y, 3/2-X, +Z; <sup>6</sup>+X, +Y, 1-Z; <sup>7</sup>2-Y, +X, +Z; <sup>8</sup>2-X, 2-Y, 2-Z; <sup>9</sup>+Y, 2-X, 2-Z.

BVS analysis for **AIOC-152**.

| BVS Value      | Bond distance          |        | BVS Value      | Bond distance          |        |
|----------------|------------------------|--------|----------------|------------------------|--------|
| Al03<br>3.1657 | Al03-O00B              | 1.844  | Al04<br>3.1917 | Al04-O00A              | 1.952  |
|                | Al03-O00C              | 1.865m |                | Al04-O00C              | 1.873  |
|                | Al03-O00D              | 1.896  |                | Al04-O00F              | 1.873  |
|                | Al03-O00E              | 1.949  |                | Al04-O00G              | 1.8507 |
|                | Al03-O00I <sup>1</sup> | 1.912  |                | Al04-O00H <sup>2</sup> | 1.909  |
|                | Al03-O009              | 1.869  |                | Al04-O009              | 1.909  |
| Co01<br>2.1288 | Co01-Cl05              | 2.502  |                |                        |        |
|                | Co01-Cl06              | 2.475  |                |                        |        |
|                | Co01-Cl07              | 2.447  |                |                        |        |
|                | Co01-N1 <sup>3</sup>   | 2.163  |                |                        |        |
|                | Co01-N1 <sup>4</sup>   | 2.163  |                |                        |        |
|                | Co01-N00Z              | 2.146  |                |                        |        |

System code: <sup>2</sup>1-X, 1-Y, +Z; <sup>3</sup>-1/2+X, 3/2-Y, 2-Z; <sup>4</sup>-1/2+Y, 3/2-X, +Z.

BVS analysis for **AIOC-153**

| BVS Value      | Bond distance           |       | BVS Value      | Bond distance         |       |
|----------------|-------------------------|-------|----------------|-----------------------|-------|
| Al01<br>3.2132 | Al01-O5                 | 1.838 | Al02<br>3.0434 | Al02-O4               | 1.87  |
|                | Al01-O4 <sup>7</sup>    | 1.861 |                | Al02-O4 <sup>7</sup>  | 1.87  |
|                | Al01-O4                 | 1.861 |                | Al02-O3               | 1.942 |
|                | Al01-O1                 | 1.899 |                | Al02-O3 <sup>7</sup>  | 1.942 |
|                | Al01-O1 <sup>7</sup>    | 1.899 |                | Al02-O7               | 1.898 |
|                | Al01-O2                 | 1.944 |                | Al02-O7 <sup>7</sup>  | 1.898 |
| Ni00<br>2.2455 | Ni00-Cl08               | 2.418 | Ni01<br>2.0318 | Ni01-Cl11             | 2.503 |
|                | Ni00- Cl08 <sup>1</sup> | 2.418 |                | Ni01-Cl07             | 2.479 |
|                | Ni00-N0I                | 2.064 |                | Ni02-N3               | 2.120 |
|                | Ni00-N0N <sup>2</sup>   | 2.075 |                | Ni02-N0x <sup>2</sup> | 2.120 |
|                | Ni00-N0T <sup>3</sup>   | 2.11  |                | Ni02-N0x <sup>5</sup> | 2.120 |
|                | Ni00-N011 <sup>4</sup>  | 2.147 |                | Ni02-N0x <sup>6</sup> | 2.120 |

System code: <sup>1</sup>1/2+Y, -1/2+X, 2-Z; <sup>2</sup>1-Y, +X, +Z; <sup>3</sup>1-Y, +X, 2-Z; <sup>4</sup>+X, +Y, 2-Z; <sup>5</sup>1-X, 1-Y, 1-Z; <sup>6</sup>+Y, 1-X, 1-Z; <sup>7</sup>1/2+Y, -1/2+X, +Z;

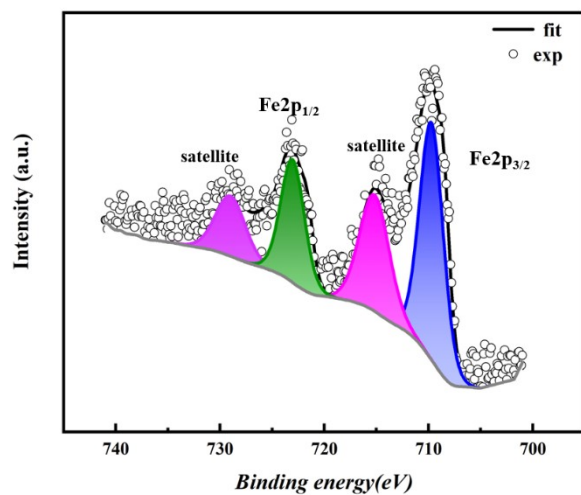

Fig. S33. High-resolution spectrum of Fe 2p for AIOC-151.

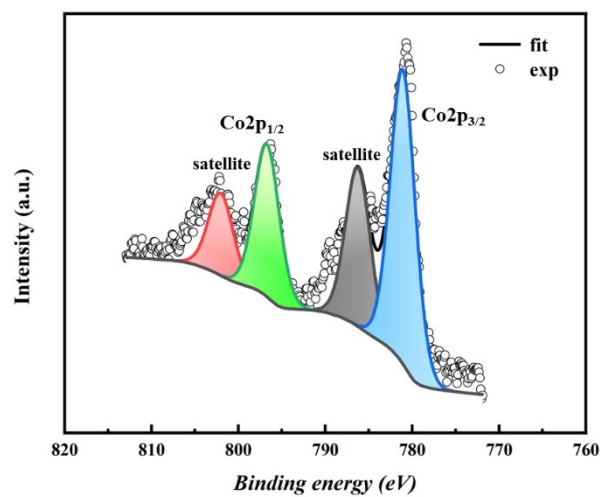

Fig. S34. High-resolution spectrum of Co 2p for AIOC-152.

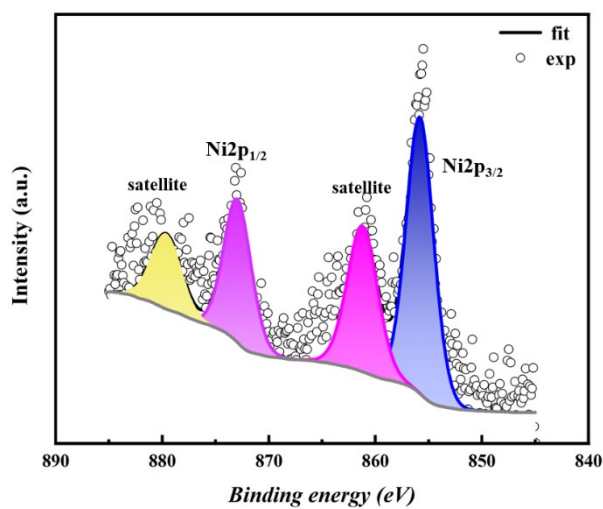

Fig. S35. High-resolution spectrum of Ni 2p for AIOC-153.

## 10. Single-component gas sorption measurement

The gas adsorption isotherms were generated on ASAP 2020 volumetric adsorption equipment. The fresh crystal samples were solvent-exchanged with methanol for **AIOC-151**, ethanol for **AIOC-155** at least 10 times within three days to make sure that the guest solvents were removed. Then the samples were evacuated at 353K for 6 h for **AIOC-151**, instead of at 373K for **AIOC-155**. The sorption measurement was maintained at 77K 273K and 298K under liquid nitrogen, ice slurry and water, respectively.

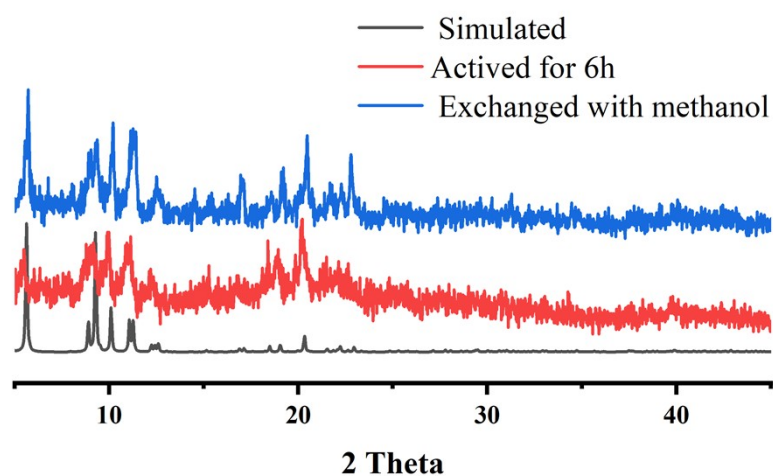

Figure S36. PXRD patterns of **AIOC-151** after methanol exchange and vacuum activation.

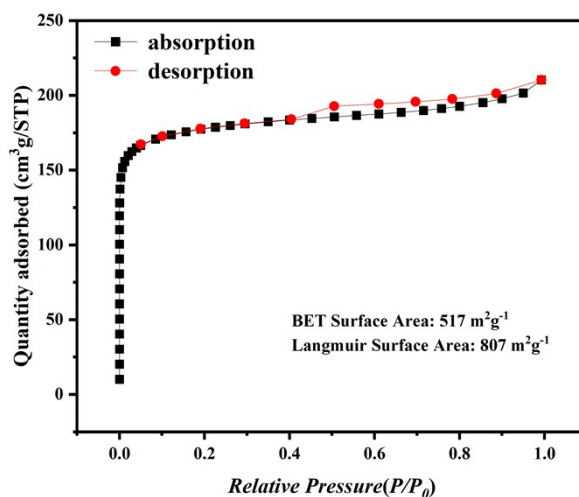

Fig. S37.  $N_2$  isotherm at 77 K of **AIOC-151** after solvent with methanol.

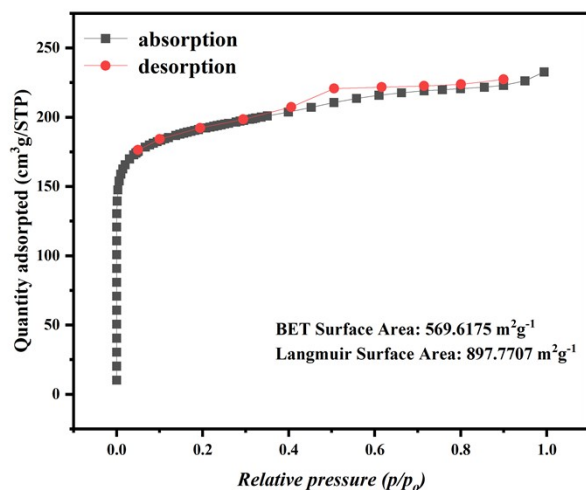

Fig. S38. N<sub>2</sub> isotherm at 77 K of AIOC-155 after solvent with ethanol.

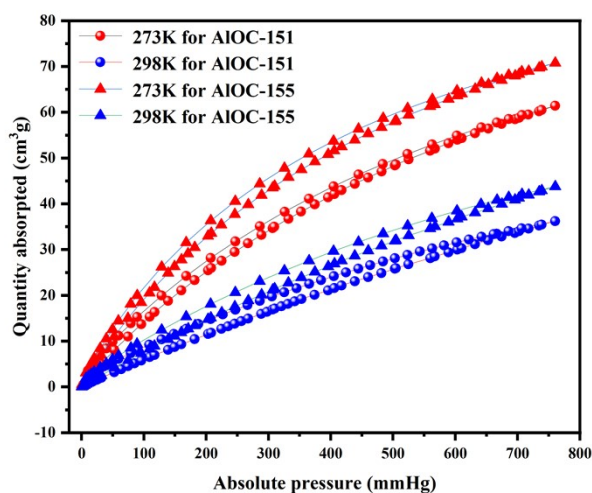

Fig. S39. CO<sub>2</sub> adsorption isotherm at 298 K and 273 K of AIOC-151 and AIOC-155. The overall adsorption effect of AIOC-155 is better than that of AIOC-151.

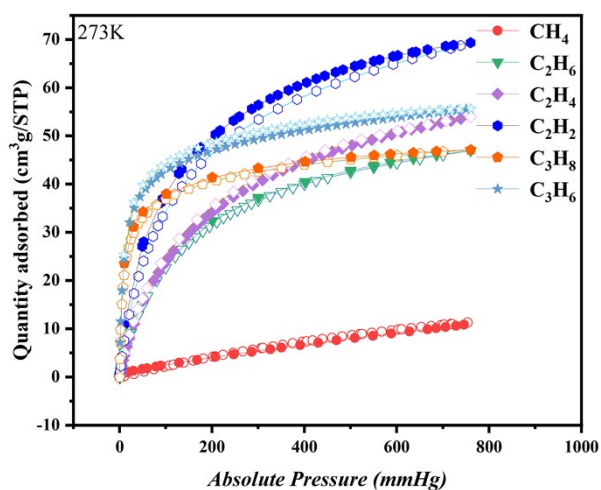

Fig. S40. Light hydrocarbon (CH<sub>4</sub>, C<sub>2</sub>H<sub>2</sub>, C<sub>2</sub>H<sub>4</sub>, C<sub>2</sub>H<sub>6</sub>, C<sub>3</sub>H<sub>6</sub> and C<sub>3</sub>H<sub>8</sub>) adsorption isotherms of AIOC-151 at 273 K.

## 11. Isotheric heat of gas adsorption

The Clausius-Clapeyron equation was employed to calculate the enthalpies of CO<sub>2</sub> adsorption for **AIOC-151**,  $a_i$  and  $b_i$  are parameters which are independent of temperature:

$$\ln P = \ln N + \frac{1}{T} \sum_{i=0}^m a_i N^i + \sum_{i=0}^n b_i N^i$$

Where  $p$  is pressure,  $N$  is the amount of uptake,  $T$  is the temperature and  $m$  and  $n$  the number of terms required to adequately describe the isotherm.

$$Q_{st} = -R \sum_{i=0}^m a_i N^i$$

Where  $R$  is the universal gas constant. The coverage dependencies of  $Q_{st}$  values were calculated from fitting the adsorption data at different temperatures for **AIOC-151**.

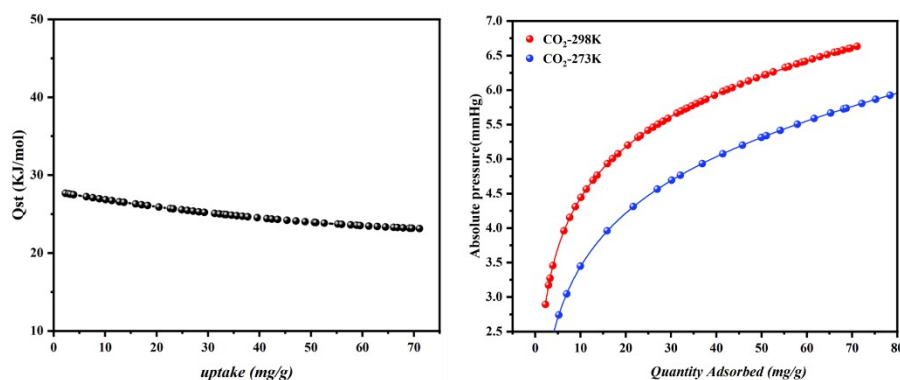

Fig. S41. The isosteric heat of CO<sub>2</sub> adsorption for **AIOC-151** is estimated by the virial equation (left); The CO<sub>2</sub> sorption isotherms for **AIOC-151** fitting by the virial method (right).

## 12. IAST calculations of adsorption selectivity

In order to evaluate the separation effect of **AIOC-151** on binary mixed-light alkanes, the single-component adsorption isotherms of light alkanes were calculated based on the dual-site Langmuir-Freundlich (DSLFL) model. Gas selectivity of mixed C<sub>3</sub>H<sub>8</sub>/CH<sub>4</sub> (50/50, v/v) and C<sub>3</sub>H<sub>6</sub>/CH<sub>4</sub> (50/50, v/v) at 298 K were carried out using the ideal adsorbed solution theory (IAST).



$$N = \frac{A_1 \frac{b_1 P^{c_1}}{1 + b_1 P^{c_1}}}{1 + \frac{b_1 P^{c_1}}{1 + b_1 P^{c_1}} + \frac{b_2 P^{c_2}}{1 + b_2 P^{c_2}}} + \frac{A_2 \frac{b_2 P^{c_2}}{1 + b_2 P^{c_2}}}{1 + \frac{b_1 P^{c_1}}{1 + b_1 P^{c_1}} + \frac{b_2 P^{c_2}}{1 + b_2 P^{c_2}}}$$

where P (unit: kPa) is the pressure of the bulk gas at equilibrium with the adsorbed phase, N (unit: mol/kg) is the adsorbed amount per mass of adsorbent,  $A_1$  and  $A_2$  (unit: mmol/g) are the saturation capacities of two different sites,  $b_1$  and  $b_2$  (unit: 1/kPa) is the affinity coefficients of these sites, and  $c_1$  and  $c_2$  represent the deviations from an ideal homogeneous surface.

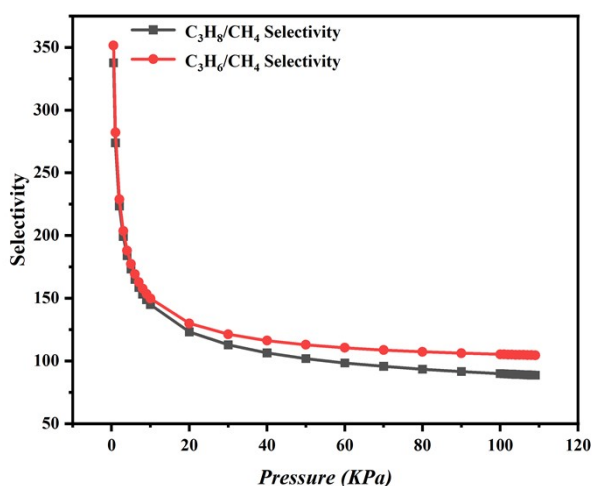

Fig. S42. the IAST selectivity of 50/50 C<sub>3</sub>H<sub>8</sub>/CH<sub>4</sub> and 50/50 C<sub>3</sub>H<sub>6</sub>/CH<sub>4</sub> for AIOc-151 at 298 K, 1 bar.

### 13. Iodine capture, release and recyclability

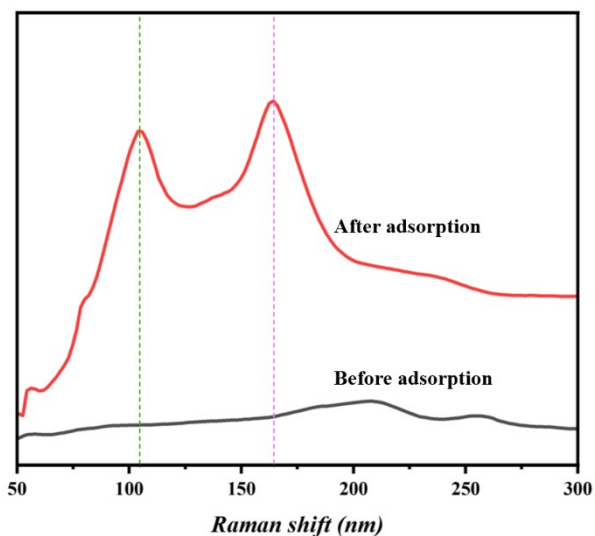

Fig. S43. Comparison of Roman spectrum of AIOc-151 before and after iodine adsorption.

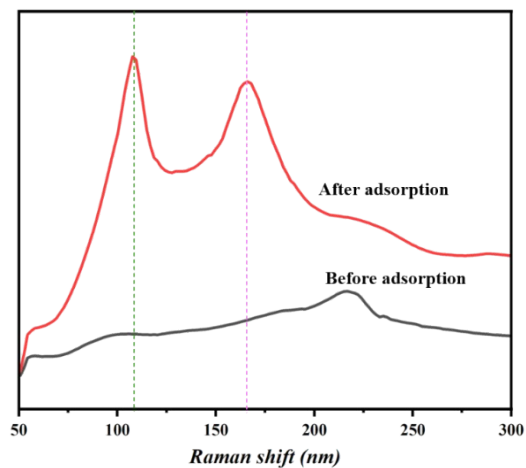

Fig. S44. Comparison of Roman spectrum of **AIOC-155** before and after iodine adsorption (collected with an excitation line of 532 nm at 10% laser power).

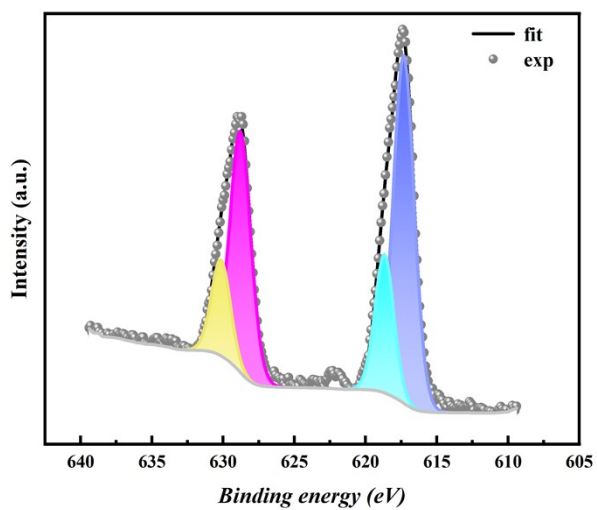

Fig. S45. The high-resolution spectrum of 3d I for  $I_2@AIOC-151$ .

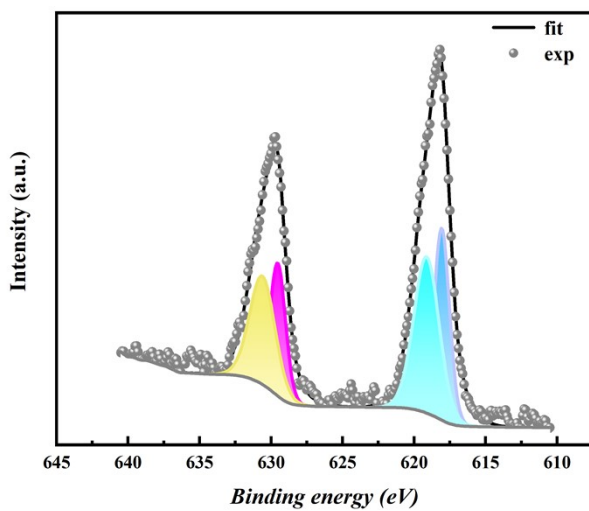

Fig. S46. The high-resolution spectrum of 3d I for  $I_2@AIOC-155$ .

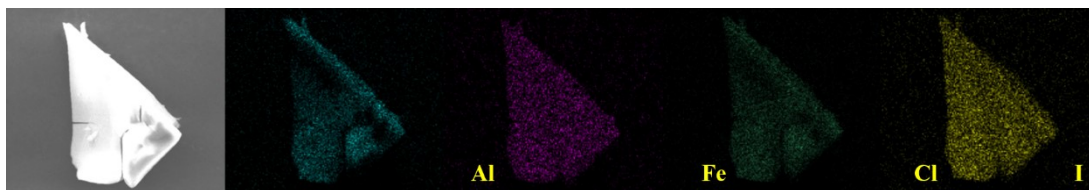

Fig. S47. EDS-mapping spectra of  $I_2@AIOC-151$ . From left to right are crystal appearance, aluminum, iron, chlorine and iodine elements.

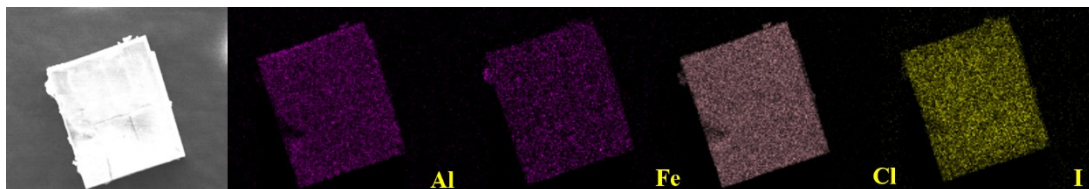

Figure S48. EDS-mapping spectra of  $I_2@AIOC-155$ . From left to right are crystal appearance, aluminum, iron, chlorine and iodine elements.

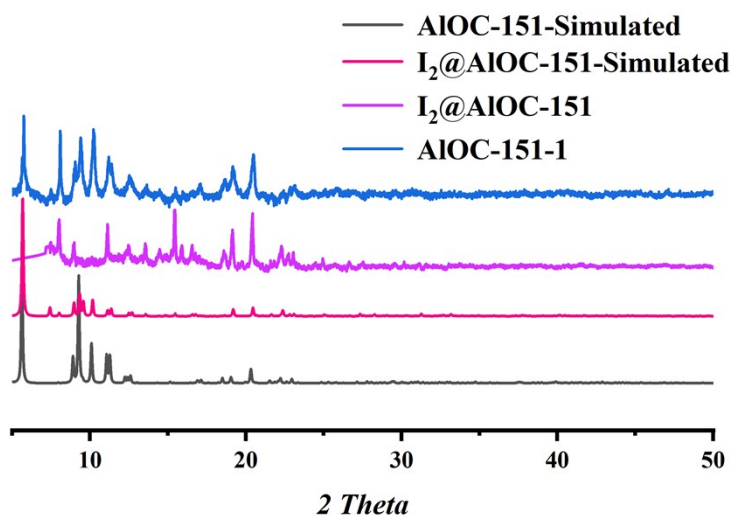

Fig. S49. PXRD patterns of **AIOC-151** after iodine adsorption and release with methanol.

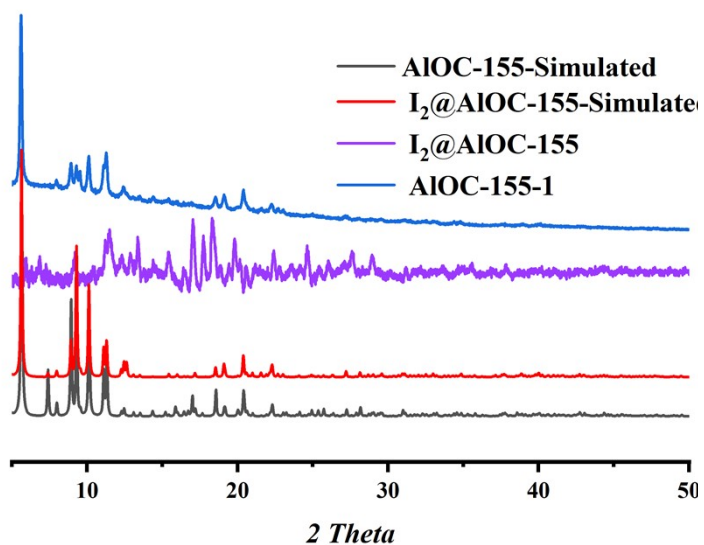

Fig. S50. PXRD patterns of **AIOC-155** after iodine adsorption and release with ethanol.

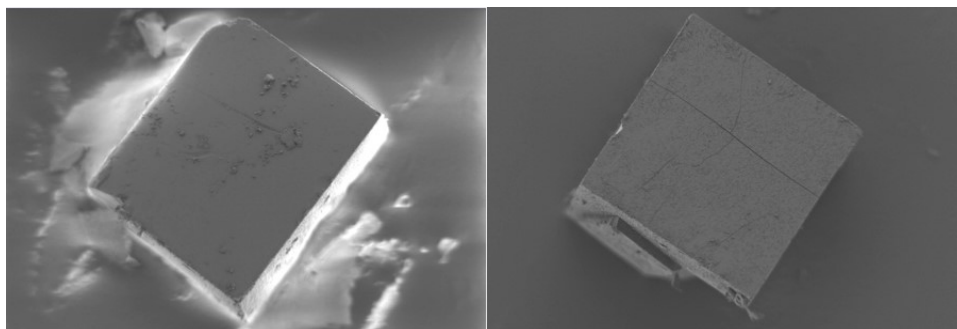

Fig. S51 the SEM images before (left) and after (right) iodine adsorption.

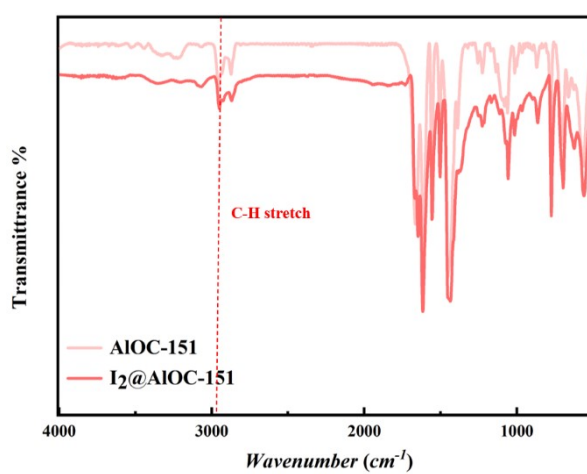

Fig. S52. FT-IR spectra of **AIOC-151** before and after iodine adsorption. the characteristic peak at  $\sim 2967.7$   $\text{cm}^{-1}$  assigned to the C-H on pyridine ring stretching vibration blue shift.

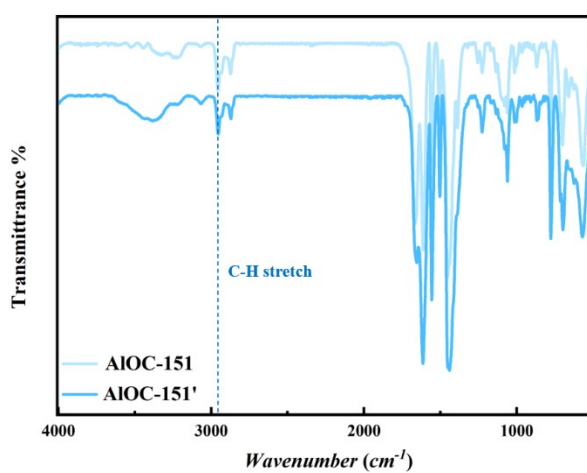

Fig. S53. FT-IR spectra of **AIOC-151** and release with methanol. The absorption peak was restored after release.

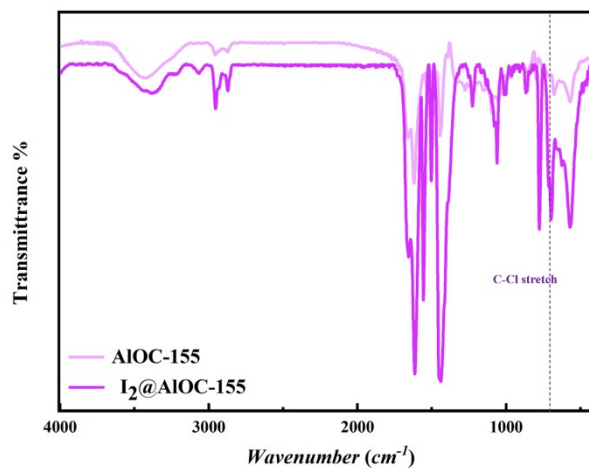

Fig. S54. FT-IR spectra of **AIOC-155** before and after iodine adsorption. the characteristic peak at  $\sim 673.1$   $\text{cm}^{-1}$  assigned to the C-Cl on pyridine ring stretching vibration red shift.

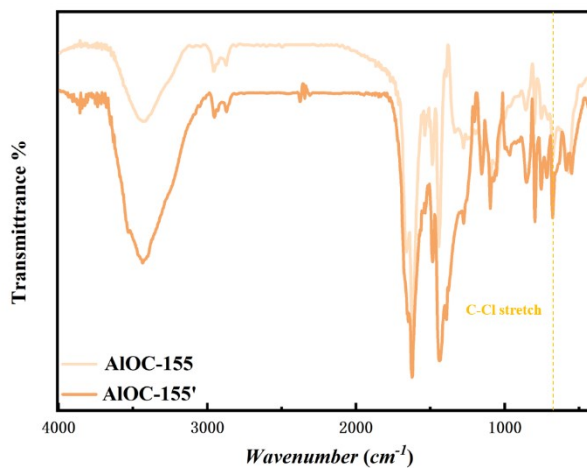

Fig. S55. FT-IR spectra of **AIOC-155** and after release with ethanol. The absorption peak was restored after release.

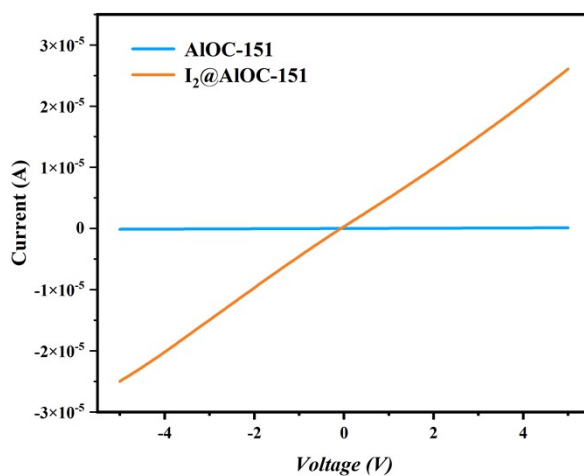

Fig. S56. I-V curves of pristine **AIOC-151** and **I<sub>2</sub>@AIOC-151**.

Table S5. BVS analysis of Fe atoms after iodine adsorption.

BVS analysis for  $I_2@AIOC-151$

|               |                       |       |               |                      |       |
|---------------|-----------------------|-------|---------------|----------------------|-------|
| Fe1<br>2.5777 | Fe1-C11               | 2.279 | Fe2<br>2.4365 | Fe2-C12 <sup>1</sup> | 2.313 |
|               | Fe1-C11 <sup>1</sup>  | 2.279 |               | Fe2-C12              | 2.314 |
|               | Fe1-N1                | 2.203 |               | Fe2-N2 <sup>2</sup>  | 2.187 |
|               | Fe1-N1 <sup>5</sup>   | 2.203 |               | Fe2-N2               | 2.187 |
|               | Fe1-N00s              | 2.151 |               | Fe2-N2 <sup>3</sup>  | 2.187 |
|               | Fe1-N00s <sup>5</sup> | 2.151 |               | Fe2-N2 <sup>1</sup>  | 2.187 |

System code: <sup>1</sup>1-X, 1-Y, -Z; <sup>2</sup>+Y, 1-X, -Z; <sup>3</sup>1-Y, +X, +Z; <sup>5</sup>+X, +Y, 1-Z;

BVS analysis for  $I_2@AIOC-155$

|               |                        |       |               |                       |       |
|---------------|------------------------|-------|---------------|-----------------------|-------|
| Fe0<br>2.3779 | Fe00-C106              | 2.387 | Fe1<br>2.3521 | Fe1-C105              | 2.429 |
|               | Fe00-C106 <sup>1</sup> | 2.387 |               | Fe1-C105 <sup>5</sup> | 2.429 |
|               | Fe00-N0F <sup>2</sup>  | 2.203 |               | Fe1-N0H <sup>6</sup>  | 2.244 |
|               | Fe00-N0F <sup>3</sup>  | 2.203 |               | Fe1-N0H               | 2.244 |
|               | Fe00-N0G               | 2.218 |               | Fe1-N0H <sup>3</sup>  | 2.244 |
|               | Fe00-N0G <sup>4</sup>  | 2.218 |               | Fe1-N0H <sup>7</sup>  | 2.244 |

System code: <sup>1</sup>-1/2+Y, 1/2+X, 1-Z; <sup>2</sup>1-Y, +X, 1-Z; <sup>3</sup>1-Y, +X, +Z; <sup>4</sup>+X, +Y, 1-Z; <sup>5</sup>1-X, 1-Y, 2-Z; <sup>6</sup>+X, +Y, 2-Z; <sup>7</sup>+Y, 1-X, 2-Z;

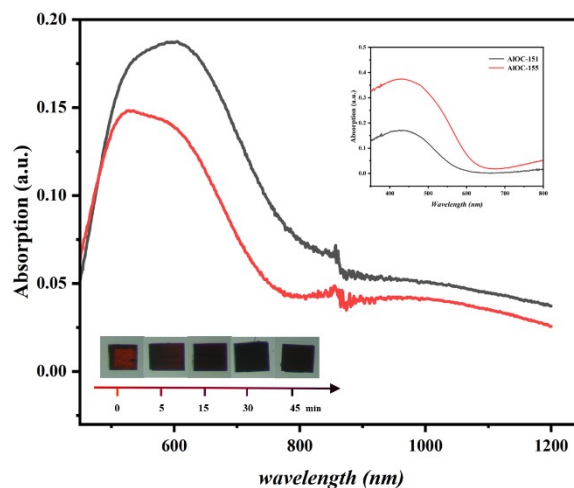

Fig. S57. UV visible spectra of  $I_2@AIOC-151$  (black line) and  $I_2@AIOC-155$  (red line); upper right inset: UV visible spectra of  $AIOC-151$  and  $AIOC-155$ ; lower left inset: photographs showing the visible color change when  $AIOC-151$  were exposed to  $I_2$  vapor.

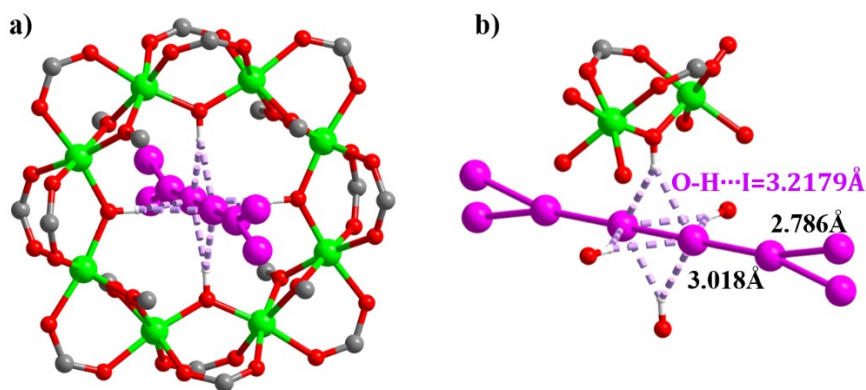

Fig. S58 a) O-H...I interaction and b) the bond length in adsorption site I of  $I_2@AIOC-151$ . (Color codes: Al, green; Fe, cyan; C, gray; N, blue; O, red. I, pink. Some n-butanol and isonicotinic acid rings are omitted for clarity.

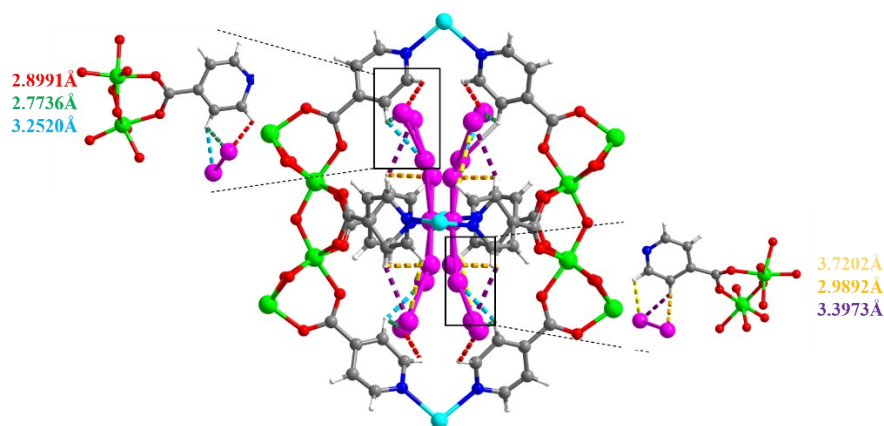

Fig. S59 C-H...I interaction and the bond length in adsorption site II of  $I_2@AIOC-151$ . (Color codes: Al, green; Fe, cyan; C, gray; N, blue; O, red. I, pink. Some n-butanol and isonicotinic acid rings are omitted for clarity.

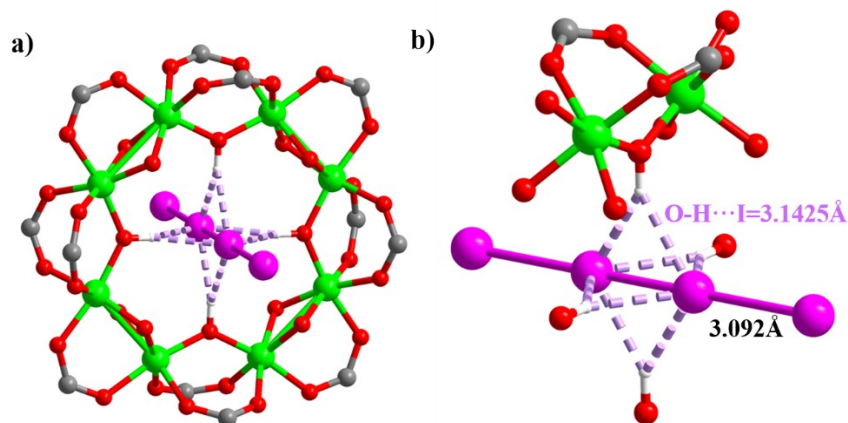

Fig. S60 O-H...I interaction and (b) the bond length in adsorption site I of  $I_2@AIOC-155$ . (Color codes: Al, green; Fe, cyan; C, gray; N, blue; O, red. I, pink. Some n-butanol and isonicotinic acid rings are omitted for clarity.

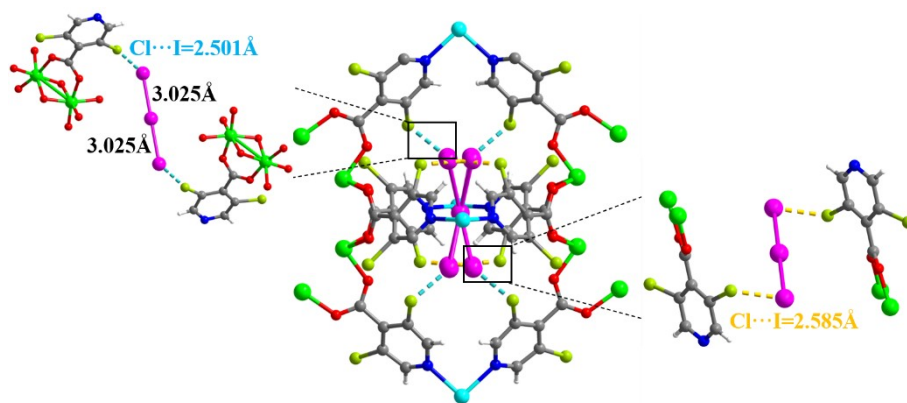

Fig. S61 C-Cl $\cdots$ I interaction and the bond length in adsorption site II of I<sub>2</sub>@AIOC-155. (Color codes: Al, green; Fe, cyan; C, gray; N, blue; O, red. I, pink. Some n-butanol and isonicotinic acid rings are omitted for clarity.

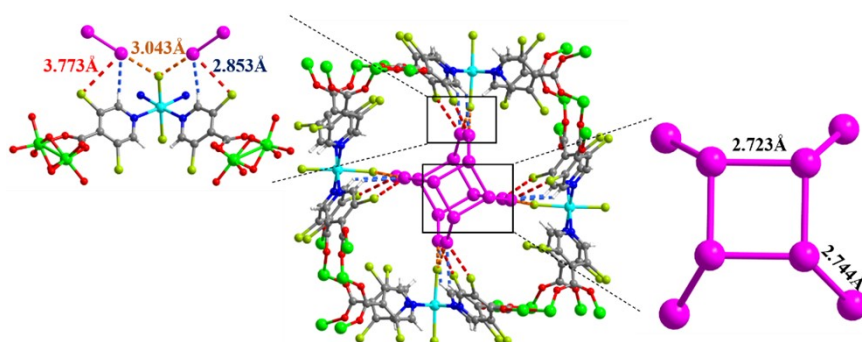

Fig. S62 C-Cl $\cdots$ I, C-H $\cdots$ I interaction and the bond length in adsorption site III of I<sub>2</sub>@AIOC-155. (Color codes: Al, green; Fe, cyan; C, gray; N, blue; O, red. I, pink. Some n-butanol and isonicotinic acid rings are omitted for clarity.

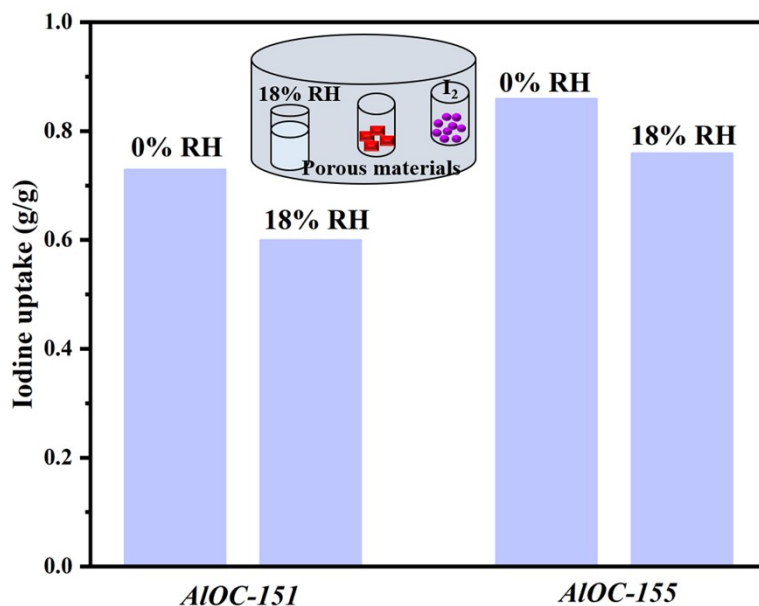

Fig. S63 the Adsorption capacity of porous materials at 80 °C in saturated iodine vapor with 0% RH and 18% RH.



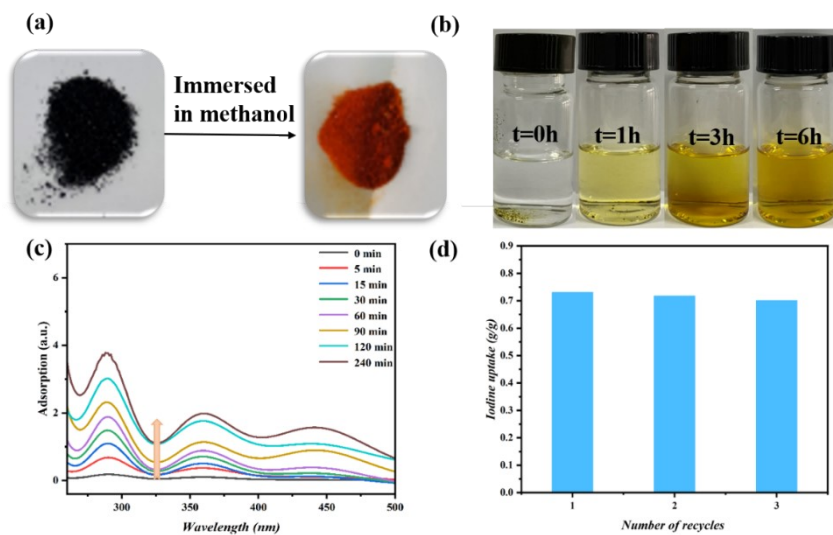

Fig. S64 (a) the photos of Crystal color changes of AIOC-151 before and after methanol release; (b) photos of the I<sub>2</sub>-released process of I<sub>2</sub>@AIOC-151 soaked in methanol; (c) temporal evolution absorbance for the I<sub>2</sub> released from methanol; (d) three times cycle experimental of AIOC-151.

## 14. Crystallography data

Table S6. Comparison of parameters for **AlOC-151** before and after iodine adsorption and release.

|                                                     | AlOC-151       | I <sub>2</sub> @AlOC-151 | AlOC-151-1     |
|-----------------------------------------------------|----------------|--------------------------|----------------|
| Crystal system                                      | tetragonal     | tetragonal               | tetragonal     |
| Space group                                         | <i>P4/mbm</i>  | <i>P4/mbm</i>            | <i>P4/mbm</i>  |
| a [Å]                                               | 22.1660(2)     | 22.0217(4)               | 22.1414(2)     |
| b [Å]                                               | 22.1660(2)     | 22.0217(4)               | 22.1414(2)     |
| c [Å]                                               | 18.5421(3)     | 18.4702(5)               | 18.5120(2)     |
| $\alpha$ [°]                                        | 90             | 90                       | 90             |
| $\beta$ [°]                                         | 90             | 90                       | 90             |
| $\gamma$ [°]                                        | 90             | 90                       | 90             |
| V [Å <sup>3</sup> ]                                 | 9110.3(2)      | 8957.2(4)                | 9075.35(19)    |
| R <sub>1</sub> , wR <sub>2</sub> [I>2 $\sigma$ (I)] | 0.0751, 0.2467 | 0.2154, 0.5111           | 0.0712, 0.2322 |
| R <sub>1</sub> , wR <sub>2</sub> [all data]         | 0.0853, 0.2587 | 0.2259, 0.5195           | 0.0820, 0.2434 |

Table S7. Comparison of parameters for **AlOC-155** before and after iodine adsorption and release.

|                                                     | AlOC-155       | I <sub>2</sub> @AlOC-155 | AlOC-155-1     |
|-----------------------------------------------------|----------------|--------------------------|----------------|
| Crystal system                                      | tetragonal     | tetragonal               | tetragonal     |
| Space group                                         | <i>P4/mbm</i>  | <i>P4/mbm</i>            | <i>P4/mbm</i>  |
| a [Å]                                               | 22.1208(2)     | 22.1507(10)              | 22.0492(3)     |
| b [Å]                                               | 22.1208(2)     | 22.1507(10)              | 22.0492(3)     |
| c [Å]                                               | 18.5119(2)     | 18.5030(2)               | 18.4944(3)     |
| $\alpha$ [°]                                        | 90             | 90                       | 90             |
| $\beta$ [°]                                         | 90             | 90                       | 90             |
| $\gamma$ [°]                                        | 90             | 90                       | 90             |
| V [Å <sup>3</sup> ]                                 | 9058.42(19)    | 9078.56(13)              | 8991.4(3)      |
| R <sub>1</sub> , wR <sub>2</sub> [I>2 $\sigma$ (I)] | 0.0954, 0.2685 | 0.1844, 0.4761           | 0.0832, 0.2482 |
| R <sub>1</sub> , wR <sub>2</sub> [all data]         | 0.1111, 0.2829 | 0.2025, 0.4934           | 0.0922, 0.2606 |

Table S8. Experimental single-crystal X-ray data for AIOC-150, AIOC-151 and AIOC-152.

|                                              | AIOC-150                                                                                                          | AIOC-151                                                                                                          | AIOC-152                                                                                                         |
|----------------------------------------------|-------------------------------------------------------------------------------------------------------------------|-------------------------------------------------------------------------------------------------------------------|------------------------------------------------------------------------------------------------------------------|
| Empirical formula                            | Al <sub>8</sub> Fe <sub>2</sub> Cl <sub>4</sub> C <sub>104</sub> N <sub>24</sub> O <sub>43</sub> H <sub>142</sub> | Al <sub>8</sub> Fe <sub>3</sub> Cl <sub>6</sub> C <sub>104</sub> N <sub>12</sub> O <sub>38</sub> H <sub>132</sub> | Al <sub>8</sub> Co <sub>3</sub> Cl <sub>7</sub> C <sub>108</sub> N <sub>8</sub> O <sub>38</sub> H <sub>132</sub> |
| Formula weight                               | 2885.75                                                                                                           | 2754.30                                                                                                           | 2791.06                                                                                                          |
| Temperature / k                              | 100.01(10)                                                                                                        | 293(2)                                                                                                            | 293(2)                                                                                                           |
| Crystal system                               | tetragonal                                                                                                        | tetragonal                                                                                                        | tetragonal                                                                                                       |
| Space group                                  | <i>P4/nbm</i>                                                                                                     | <i>P4/mbm</i>                                                                                                     | <i>P4/mbm</i>                                                                                                    |
| a [Å]                                        | 27.5493(2)                                                                                                        | 22.1660(2)                                                                                                        | 21.99545(17)                                                                                                     |
| b [Å]                                        | 27.5493(2)                                                                                                        | 22.1660(2)                                                                                                        | 21.99545(17)                                                                                                     |
| c [Å]                                        | 12.87900(10)                                                                                                      | 18.5421(3)                                                                                                        | 18.3985(2)                                                                                                       |
| α [°]                                        | 90                                                                                                                | 90                                                                                                                | 90                                                                                                               |
| β [°]                                        | 90                                                                                                                | 90                                                                                                                | 90                                                                                                               |
| γ [°]                                        | 90                                                                                                                | 90                                                                                                                | 90                                                                                                               |
| V [Å <sup>3</sup> ]                          | 9774.70(16)                                                                                                       | 9110.3(2)                                                                                                         | 8901.23(17)                                                                                                      |
| Z                                            | 2                                                                                                                 | 2                                                                                                                 | 2                                                                                                                |
| ρ <sub>calcd</sub> [g cm <sup>-3</sup> ]     | 0.980                                                                                                             | 1.004                                                                                                             | 1.041                                                                                                            |
| μ [mm <sup>-1</sup> ]                        | 2.566                                                                                                             | 2.406                                                                                                             | 2.730                                                                                                            |
| F (000)                                      | 3004.0                                                                                                            | 2856.0                                                                                                            | 2888.0                                                                                                           |
| Index ranges                                 | -34 ≤ h ≤ 34<br>-25 ≤ k ≤ 30<br>-7 ≤ l ≤ 15                                                                       | -27 ≤ h ≤ 16<br>-13 ≤ k ≤ 28<br>-24 ≤ l ≤ 23                                                                      | -28 ≤ h ≤ 28<br>-14 ≤ k ≤ 28<br>-23 ≤ l ≤ 23                                                                     |
| Reflections collected                        | 30845                                                                                                             | 35007                                                                                                             | 35955                                                                                                            |
| Independent refs [R <sub>int</sub> ]         | 5141 [0.0280]                                                                                                     | 5506 [0.0338]                                                                                                     | 5379 [0.0248]                                                                                                    |
| data/restraints/parameters                   | 5141/84/276                                                                                                       | 5506/21/239                                                                                                       | 5379/6/274                                                                                                       |
| Goodness-of-fit on F <sup>2</sup>            | 1.384                                                                                                             | 1.064                                                                                                             | 1.074                                                                                                            |
| R <sub>1</sub> , wR <sub>2</sub> [I > 2σ(I)] | 0.0926, 0.2924                                                                                                    | 0.0751, 0.2467                                                                                                    | 0.0769, 0.2549                                                                                                   |
| R <sub>1</sub> , wR <sub>2</sub> [all data]  | 0.1019, 0.03110                                                                                                   | 0.0853, 0.2587                                                                                                    | 0.0797, 0.2591                                                                                                   |

Table S9. Experimental single crystal X-ray data for AIOC-153, AIOC-154 and AIOC-155.

|                                              | AIOC-153                                                                                                          | AIOC-154                                                                                                          | AIOC-155                                                                                                           |
|----------------------------------------------|-------------------------------------------------------------------------------------------------------------------|-------------------------------------------------------------------------------------------------------------------|--------------------------------------------------------------------------------------------------------------------|
| Empirical formula                            | Al <sub>8</sub> Ni <sub>3</sub> Cl <sub>8</sub> C <sub>104</sub> N <sub>12</sub> O <sub>36</sub> H <sub>124</sub> | Al <sub>8</sub> Fe <sub>3</sub> Br <sub>7</sub> C <sub>104</sub> N <sub>12</sub> O <sub>36</sub> H <sub>124</sub> | Al <sub>8</sub> Fe <sub>3</sub> Cl <sub>19</sub> C <sub>104</sub> N <sub>12</sub> O <sub>36</sub> H <sub>112</sub> |
| Formula weight                               | 2617.34                                                                                                           | 3057.71                                                                                                           | 3162.99                                                                                                            |
| Temperature / k                              | 100.00(10)                                                                                                        | 100.00(10)                                                                                                        | 100.00(10)                                                                                                         |
| Crystal system                               | tetragonal                                                                                                        | tetragonal                                                                                                        | tetragonal                                                                                                         |
| Space group                                  | <i>P</i> 4bm                                                                                                      | <i>P</i> 4/mbm                                                                                                    | <i>P</i> 4/mbm                                                                                                     |
| a [Å]                                        | 21.8334(3)                                                                                                        | 22.0664(10)                                                                                                       | 22.1208(2)                                                                                                         |
| b [Å]                                        | 21.8334(3)                                                                                                        | 22.0664(10)                                                                                                       | 22.1208(2)                                                                                                         |
| c [Å]                                        | 18.3026(5)                                                                                                        | 18.4584(3)                                                                                                        | 18.5119(2)                                                                                                         |
| α [°]                                        | 90                                                                                                                | 90                                                                                                                | 90                                                                                                                 |
| β [°]                                        | 90                                                                                                                | 90                                                                                                                | 90                                                                                                                 |
| γ [°]                                        | 90                                                                                                                | 90                                                                                                                | 90                                                                                                                 |
| V [Å <sup>3</sup> ]                          | 8724.8(3)                                                                                                         | 8987.88(9)                                                                                                        | 9058.42(19)                                                                                                        |
| Z                                            | 2                                                                                                                 | 2                                                                                                                 | 2                                                                                                                  |
| ρ <sub>calcd</sub> [g cm <sup>-3</sup> ]     | 0.996                                                                                                             | 1.130                                                                                                             | 1.160                                                                                                              |
| μ [mm <sup>-1</sup> ]                        | 3.062                                                                                                             | 3.088                                                                                                             | 3.606                                                                                                              |
| F (000)                                      | 2680.0                                                                                                            | 3091.0                                                                                                            | 3226.0                                                                                                             |
| Index ranges                                 | -24 ≤ h ≤ 25<br>-19 ≤ k ≤ 28<br>-23 ≤ l ≤ 18                                                                      | -27 ≤ h ≤ 28<br>-24 ≤ k ≤ 28<br>-23 ≤ l ≤ 12                                                                      | -25 ≤ h ≤ 20<br>-28 ≤ k ≤ 27<br>-23 ≤ l ≤ 23                                                                       |
| Reflections collected                        | 31843                                                                                                             | 31137                                                                                                             | 32144                                                                                                              |
| Independent refs [R <sub>int</sub> ]         | 8869[0.0761]                                                                                                      | 5407 [0.0273]                                                                                                     | 5430 [0.0411]                                                                                                      |
| date/restraints/parameters                   | 8869/220/490                                                                                                      | 5407/355/282                                                                                                      | 5430/48/332                                                                                                        |
| Goodness-of-fit on F <sup>2</sup>            | 1.008                                                                                                             | 1.297                                                                                                             | 1.092                                                                                                              |
| R <sub>1</sub> , wR <sub>2</sub> [I > 2σ(I)] | 0.0883, 0.2402                                                                                                    | 0.0851, 0.2800                                                                                                    | 0.0954, 0.2685                                                                                                     |
| R <sub>1</sub> , wR <sub>2</sub> [all data]  | 0.1246, 0.2714                                                                                                    | 0.0908, 0.2879                                                                                                    | 0.1111, 0.2829                                                                                                     |

Table S10. Experimental single-crystal X-ray data for **I<sub>2</sub>@AIOC-151** and **I<sub>2</sub>@AIOC-155**.

|                                              | I <sub>2</sub> @AIOC-151                                                                                                           | I <sub>2</sub> @AIOC-155                                                                                                            |
|----------------------------------------------|------------------------------------------------------------------------------------------------------------------------------------|-------------------------------------------------------------------------------------------------------------------------------------|
| Empirical formula                            | Al <sub>8</sub> Fe <sub>3</sub> Cl <sub>6</sub> C <sub>100</sub> N <sub>12</sub> O <sub>36</sub> H <sub>120</sub> I <sub>5.5</sub> | Al <sub>8</sub> Fe <sub>3</sub> Cl <sub>18</sub> C <sub>104</sub> N <sub>12</sub> O <sub>36</sub> H <sub>116</sub> I <sub>3.2</sub> |
| Formula weight                               | 3360.11                                                                                                                            | 3545.75                                                                                                                             |
| Temperature / k                              | 100.01(12)                                                                                                                         | 100.00(10)                                                                                                                          |
| Crystal system                               | tetragonal                                                                                                                         | tetragonal                                                                                                                          |
| Space group                                  | <i>P4/mbm</i>                                                                                                                      | <i>P4/mbm</i>                                                                                                                       |
| a [Å]                                        | 22.0217(4)                                                                                                                         | 22.1507(10)                                                                                                                         |
| b [Å]                                        | 22.0217(4)                                                                                                                         | 22.1507(10)                                                                                                                         |
| c [Å]                                        | 18.4702(5)                                                                                                                         | 18.5030(2)                                                                                                                          |
| α [°]                                        | 90                                                                                                                                 | 90                                                                                                                                  |
| β [°]                                        | 90                                                                                                                                 | 90                                                                                                                                  |
| γ [°]                                        | 90                                                                                                                                 | 90                                                                                                                                  |
| V [Å <sup>3</sup> ]                          | 8957.2(4)                                                                                                                          | 9078.56(13)                                                                                                                         |
| Z                                            | 2                                                                                                                                  | 2                                                                                                                                   |
| ρ <sub>calcd</sub> [g cm <sup>-3</sup> ]     | 1.246                                                                                                                              | 1.297                                                                                                                               |
| μ [mm <sup>-1</sup> ]                        | 11.056                                                                                                                             | 7.882                                                                                                                               |
| F (000)                                      | 3335.0                                                                                                                             | 3490.0                                                                                                                              |
|                                              | -25 ≤ h ≤ 25                                                                                                                       | -25 ≤ h ≤ 28                                                                                                                        |
| Index ranges                                 | -26 ≤ k ≤ 26                                                                                                                       | -23 ≤ k ≤ 28                                                                                                                        |
|                                              | -22 ≤ l ≤ 18                                                                                                                       | -23 ≤ l ≤ 23                                                                                                                        |
| Reflections collected                        | 25354                                                                                                                              | 32712                                                                                                                               |
| Independent refs [Rint]                      | 4642[0.0902]                                                                                                                       | 5441 [0.0534]                                                                                                                       |
| date/restraints/parameters                   | 4642/108/310                                                                                                                       | 5541/127/357                                                                                                                        |
| Goodness-of-fit on F <sup>2</sup>            | 2.286                                                                                                                              | 2.303                                                                                                                               |
| R <sub>1</sub> , wR <sub>2</sub> [I > 2σ(I)] | 0.2154, 0.5111                                                                                                                     | 0.1844, 0.4761                                                                                                                      |
| R <sub>1</sub> , wR <sub>2</sub> [all data]  | 0.2259, 0.5195                                                                                                                     | 0.2025, 0.4934                                                                                                                      |

Table S11. Experimental single-crystal X-ray data for **AIOC-151'** and **AIOC-155'**.

|                                              | AIOC-151-1                                                                                | AIOC-155-1                                                                                   |
|----------------------------------------------|-------------------------------------------------------------------------------------------|----------------------------------------------------------------------------------------------|
| Empirical formula                            | $\text{Al}_8\text{Fe}_3\text{Cl}_7\text{C}_{104}\text{N}_{12}\text{O}_{36}\text{H}_{120}$ | $\text{Al}_8\text{Fe}_3\text{Cl}_{19}\text{C}_{104}\text{N}_{12}\text{O}_{36}\text{H}_{112}$ |
| Formula weight                               | 2609.26                                                                                   | 3162.99                                                                                      |
| Temperature / k                              | 293(2)                                                                                    | 100.01(10)                                                                                   |
| Crystal system                               | tetragonal                                                                                | tetragonal                                                                                   |
| Space group                                  | <i>P4/mbm</i>                                                                             | <i>P4/mbm</i>                                                                                |
| a [Å]                                        | 22.1414(2)                                                                                | 22.0492(3)                                                                                   |
| b [Å]                                        | 22.1414(2)                                                                                | 22.0492(3)                                                                                   |
| c [Å]                                        | 18.5120(2)                                                                                | 18.4944(3)                                                                                   |
| $\alpha$ [°]                                 | 90                                                                                        | 90                                                                                           |
| $\beta$ [°]                                  | 90                                                                                        | 90                                                                                           |
| $\gamma$ [°]                                 | 90                                                                                        | 90                                                                                           |
| V [Å <sup>3</sup> ]                          | 9075.35(19)                                                                               | 8991.4(3)                                                                                    |
| Z                                            | 2                                                                                         | 2                                                                                            |
| $\rho_{\text{calcd}}$ [g cm <sup>-3</sup> ]  | 0.955                                                                                     | 1.168                                                                                        |
| $\mu$ [mm <sup>-1</sup> ]                    | 2.488                                                                                     | 3.632                                                                                        |
| F (000)                                      | 2658.0                                                                                    | 3226.0                                                                                       |
| Index ranges                                 | -19 ≤ h ≤ 26<br>-27 ≤ k ≤ 28<br>-23 ≤ l ≤ 20                                              | -25 ≤ h ≤ 25<br>-25 ≤ k ≤ 23<br>-21 ≤ l ≤ 21                                                 |
| Reflections collected                        | 31143                                                                                     | 28983                                                                                        |
| Independent refs [Rint]                      | 5539[0.0349]                                                                              | 4092 [0.0409]                                                                                |
| date/restraints/parameters                   | 5539/55/268                                                                               | 4092/49/323                                                                                  |
| Goodness-of-fit on F <sup>2</sup>            | 1.041                                                                                     | 1.032                                                                                        |
| R <sub>1</sub> , wR <sub>2</sub> [I > 2σ(I)] | 0.0712, 0.2322                                                                            | 0.0832, 0.2482                                                                               |
| R <sub>1</sub> , wR <sub>2</sub> [all data]  | 0.0820, 0.2434                                                                            | 0.0922, 0.2606                                                                               |

## 15. Reference

- [1] A. Fateeva, P.-A. Chater, C.-P. Ireland, A.-A. Tahir, Y.-Z. Khimyak, P.-V. Wiper, J.-R. Darwent, M.-J. Rosseinsky, *Angew. Chem. Int. Ed.* 2012, **51**, 7440-7444.
- [2] T. Ahnfeldt, N. Guillou, D. Gunzelmann, I. Margiolaki, T. Loiseau, G. Ferey, J. Senker, N. Stock, *Angew. Chem. Int. Ed.* 2009, **48**, 5163-5166.
- [3] H. Reinsch, M. Feyand, T. Ahnfeldt, N. Stock, *Dalton Trans.* 2012, **41**, 4164-4171.
- [4] M. Kruger, A.-K. Inge, H. Reinsch, Y.-H. Li, M. Wahiduzzaman, C.-H. Lin, S.-L. Wang, G. Maurin, N. Stock, *Inorg. Chem.* 2017, **56**, 5851-5862.
- [5] T. Loiseau, C. Serre, C. Huguenard, G. Fink, F. Taulelle, M. Henry, T. Bataille, G. Ferey, *Chem. Eur. J.* 2004, **10**, 1373-1382.
- [6] H. Embrechts, M. Kriesten, M. Ermer, W. Peukert, M. Hartmann, M. Distaso, *RSC Adv.* 2020, **10**, 7336-7348.
- [7] P. Serra-Crespo, E.-V. Ramos-Fernandez, J. Gascon, F. Kapteijn, *Chem. Mater.* 2011, **23**, 2565-2572.
- [8] N. Hanikel, X. Pei, S. Chheda, H. Lyu, W. Jeong, J. Sauer, L. Gagliardi, O. M. Yaghi, *Science* 2021, **374**, 454-459
- [9] F. Gandara, H. Furukawa, S. Lee, O. M. Yaghi, *J. Am. Chem. Soc.* 2014, **136**, 5271-5274.
- [10] S. Lee, E.-A. Kapustin, O. M. Yaghi, *Science* 2016, **353**, 808-811.
- [11] E.-D. Bloch, D. Britt, C. Lee, C.-J. Doonan, F.-J. Uribe-Romo, H. Furukawa, J.-R. Long, O. M. Yaghi, *J. Am. Chem. Soc.* 2010, **132**, 14382-14384.
- [12] L. Geng, C.-H. Liu, S.-T. Wang, W.-H. Fang, J. Zhang, *Angew. Chem. Int. Ed.* 2020, **59**, 16735-16740.
- [13] M. Dan-Hardi, C. Serre, T. Frot, L. Rozes, G. Maurin, C. Sanchez, G. Ferey, *J. Am. Chem. Soc.* 2009, **131**, 10857-10859.
- [14] Y.-Y. Sun, D.-F. Lu, Y.-X. Sun, M.-Y. Gao, N. Zheng, C. Gu, F. Wang, J. Zhang, *ACS Mater. Lett.* 2020, **3**, 64-68.
- [15] S. Wang, H. Reinsch, N. Heymans, M. Wahiduzzaman, C. Martineau-Corcoss, G.-De Weireld, G. Maurin, C. Serre, *Matter* 2020, **2**, 1-11.
